# Supplementary material for: Praseodymium–selenium connecting selenotungstate containing mixed building blocks for catalytic synthesis of aza-heterocycles
Source: Royal Society of Chemistry journal article supplement (doi:10.1039/d4qi02897j), 2025-01-01
Supplement: d4qi02897j1.pdf [file d4qi02897j1.pdf]

## Supporting Information

Praseodymium-selenium connecting selenotungstate containing mixed building blocks for catalytic synthesis of aza-heterocycles

Guoping Yang,<sup>†a</sup> Jiawei Cao,<sup>†a</sup> Zhoufu Lin,<sup>a</sup> Shixiong Li,<sup>\*b</sup> Yayu Dong,<sup>\*c</sup> Yufeng Liu<sup>\*a</sup>

<sup>a</sup>Jiangxi Key Laboratory for Mass Spectrometry and Instrumentation, Jiangxi Province Key Laboratory of Synthetic Chemistry, East China University of Technology, Nanchang 330013, China.

<sup>b</sup>School of Mechanical and Resource Engineering, Wuzhou University, Wuzhou, Guangxi 543003, P. R. China.

<sup>c</sup>School of Materials Science and Engineering, East China Jiaotong University, Nanchang, 330013, China.

\*Corresponding Author: lxx1324@163.com (S. X. Li); zmydong@163.com (Y. Y. Dong); yfliu@ecut.edu.cn (Y. F. Liu).

<sup>†</sup>These authors contributed equally to this work.

### Table of Contents

|                                       |    |
|---------------------------------------|----|
| 1. General Information .....          | 2  |
| 2. Experimental.....                  | 2  |
| 3. Characterization.....              | 3  |
| 4. Characterization of Products ..... | 10 |
| 5. Notes and References .....         | 35 |

## 1. General Information

### Materials and Methods

The FT-IR spectrum was obtained by using a Fourier transform infrared (FT-IR) (4000-500  $\text{cm}^{-1}$ ) spectrometer (Thermo Nicolet iS5) at 0.5  $\text{cm}^{-1}$  resolution and 16 scans. Inductively coupled plasma optical emission spectrum (ICP-OES) data were obtained on an Agilent 725 ICP-OES spectrometer. Powder X-ray diffraction (PXRD) was performed on a Bruker D8 Advance diffractometer with Cu  $K\alpha$  radiation ( $\lambda = 1.5406 \text{ \AA}$ ) at room temperature. Flash column chromatography was performed using silica gel of 200-300 mesh. The GC analysis was performed on Agilent 7890B equipped with a capillary column (HP-5, 30 m  $\times$  0.25  $\mu\text{m}$ ) using a flame ionization detector. The GC-MS were recorded on Agilent 7890B-7000D and Thermo Fisher/ISQ7000.

### X-ray Crystallography

The single crystal X-ray diffraction data were collected on Bruker D8 Smart Apex II diffractometer with graphite monochromated Mo  $K\alpha$  radiation ( $\lambda = 0.71073 \text{ \AA}$ ). Intensities were collected by  $\omega$ -scan and reduced on *APEX 3* and a multi-scan absorption correction was applied.<sup>1</sup> The structures were solved and refined on *Olex2* using *SHELX* package.<sup>2</sup> Parameters of the crystal data collection and refinement are given in Table S1. The CCDC number is 2373607.

## 2. Experimental

### Synthesis of Bc-Pr

$\text{Na}_2\text{WO}_4 \cdot 2\text{H}_2\text{O}$  (1.9791 g, 6 mol),  $\text{Na}_2\text{SeO}_3$  (0.1383 g, 0.8 mmol),  $\text{NH}_4\text{Cl}$  (0.3209 g, 6 mmol), DL-malic acid (0.0402 g, 0.3 mmol) was dissolved in 20 mL deionized water and stirred for 30 min. The pH value of the solution was adjusted to 4.5 by 6 M HCl. Then  $\text{PrCl}_3 \cdot 6\text{H}_2\text{O}$  (0.2133 g, 0.6 mmol) was added, and the final pH of the solution was adjusted to 3.5 by 1 M HCl and stirred for 30 min. Ultimately, the solution was filtered. About five weeks later, light green block crystals were obtained through evaporation (yield: 36% based on W). Anal. cal. (found %) for:  $\text{C}_4\text{H}_3\text{Na}_{2.5}\text{O}_{118.5}\text{Pr}_{2.5}\text{Se}_{4.25}\text{W}_{30}$ : C 2.24, H 1.28, N 0.87, W 59.93, Dy 5.05, Sb 3.78, Na 2.14, O 24.34.

### Typical procedure of the condensation reaction

In a reaction vial of 4 mL, 2-aminobenzamide (**1**, 0.2 mmol), aldehyde (**2**, 0.2 mmol), **BC-Pr** (0.6 mol%) and EtOH (1 mL) were added. Then the reactions were carried out in screw cap vials with a Teflon seal at 100  $^\circ\text{C}$  for 1.5 h. After cooling to room temperature, the mixture was further purified by column chromatography (petroleum ether/EtOAc) to afford the desired products.

### 3. Characterization

**Table S1.** Crystallographic data and structure refinement of **BC-Pr** (SQUEEZE).

| Code                                                 | BC-Pr                                                                                                                   |
|------------------------------------------------------|-------------------------------------------------------------------------------------------------------------------------|
| CCDC                                                 | 2373607                                                                                                                 |
| Empirical formula                                    | C <sub>4</sub> H <sub>3</sub> Na <sub>2.5</sub> O <sub>118.5</sub> Pr <sub>2.5</sub> Se <sub>4.25</sub> W <sub>30</sub> |
| Fw                                                   | 8207.89                                                                                                                 |
| <i>T</i> (K)                                         | 150                                                                                                                     |
| Crystal system                                       | monoclinic                                                                                                              |
| Space group                                          | <i>C2/c</i>                                                                                                             |
| <i>a</i> (Å)                                         | 64.919(4)                                                                                                               |
| <i>b</i> (Å)                                         | 17.6777(10)                                                                                                             |
| <i>c</i> (Å)                                         | 32.1895(19)                                                                                                             |
| $\alpha$ (°)                                         | 90                                                                                                                      |
| $\beta$ (°)                                          | 117.918(2)                                                                                                              |
| $\gamma$ (°)                                         | 90                                                                                                                      |
| <i>V</i> / Å <sup>3</sup>                            | 32642(3)                                                                                                                |
| <i>Z</i>                                             | 8                                                                                                                       |
| $\rho_{\text{calcd}}$ (g·cm <sup>-3</sup> )          | 3.340                                                                                                                   |
| $\mu$ (mm <sup>-1</sup> )                            | 22.809                                                                                                                  |
| <i>F</i> (000)                                       | 28116.0                                                                                                                 |
| Crystal size (mm <sup>3</sup> )                      | 0.15 × 0.106 × 0.07                                                                                                     |
| 2 $\theta$ range for data collection (°)             | 4.442 to 50                                                                                                             |
| Index ranges                                         | -77 ≤ <i>h</i> ≤ 77, -21 ≤ <i>k</i> ≤ 20, -38 ≤ <i>l</i> ≤ 38                                                           |
| Reflections collected                                | 150226                                                                                                                  |
| Unique reflections                                   | 28706 ( <i>R</i> <sub>int</sub> = 0.0951)                                                                               |
| Parameter                                            | 2305                                                                                                                    |
| Restraints                                           | 3243                                                                                                                    |
| GOOF on <i>F</i> <sup>2</sup>                        | 1.098                                                                                                                   |
| Final <i>R</i> indexes [ <i>I</i> ≥ 2σ ( <i>I</i> )] | <i>R</i> <sub>1</sub> = 0.0582, <i>wR</i> <sub>2</sub> = 0.1406                                                         |
| Final <i>R</i> indexes [all data]                    | <i>R</i> <sub>1</sub> = 0.0831, <i>wR</i> <sub>2</sub> = 0.1488                                                         |
| Largest diff. peak/hole / e Å <sup>-3</sup>          | 1.97/-1.96                                                                                                              |

$${}^a R_1 = \sum ||F_o| - |F_c|| / \sum |F_o|, {}^b wR_2 = \{ \sum [w(F_o^2 - F_c^2)^2] / \sum [w(F_o^2)^2] \}^{1/2}$$

**Table S2.** Bond valence calculations for Pr, W, Se, and selected O atoms in **BC-Pr**.

| Atom | BVS  | Valence | Atom | BVS  | Valence          |
|------|------|---------|------|------|------------------|
| Pr1  | 3.03 | +3      | W15  | 6.25 | +6               |
| Pr2  | 3.37 | +3      | W16  | 6.03 | +6               |
| Pr3  | 3.29 | +3      | W17  | 6.40 | +6               |
| Se1  | 3.75 | +4      | W18  | 6.70 | +6               |
| Se2  | 3.82 | +4      | W19  | 6.55 | +6               |
| Se3  | 3.97 | +4      | W20  | 6.36 | +6               |
| Se4  | 4.06 | +4      | W21  | 5.99 | +6               |
| W1   | 5.72 | +6      | W22  | 5.99 | +6               |
| W2   | 5.95 | +6      | W23  | 6.32 | +6               |
| W3   | 6.23 | +6      | W24  | 6.01 | +6               |
| W4   | 5.98 | +6      | W25  | 6.08 | +6               |
| W5   | 5.97 | +6      | W26  | 6.32 | +6               |
| W6   | 5.88 | +6      | W27  | 6.35 | +6               |
| W7   | 5.32 | +5      | W28  | 5.83 | +6               |
| W8   | 7.28 | +6      | W29  | 5.96 | +6               |
| W9   | 6.15 | +6      | W30  | 6.28 | +6               |
| W10  | 6.34 | +6      | O1W  | 0.39 | H <sub>2</sub> O |
| W11  | 5.85 | +6      | O2W  | 0.32 | H <sub>2</sub> O |
| W12  | 5.91 | +6      | O3W  | 0.30 | H <sub>2</sub> O |
| W13  | 6.19 | +6      | O4W  | 0.36 | H <sub>2</sub> O |
| W14  | 5.74 | +6      | O106 | 1.49 | O <sup>2-</sup>  |

Bond valence sum (BVS) analysis: The BVS values ( $V_i$ ) of metal atoms were calculated using the following equation:<sup>3</sup>

$$V_i = \sum \exp[(r_0 - r_{ij})/B] \quad (1)$$

where  $r_0$  is the bond valence parameter for a given atom pair,  $r_{ij}$  is the bond length between atoms  $i$  and  $j$  obtained from the crystal structure.

**Table S3.** Comparison of the present catalytic system with other reported catalysts in the synthesis of products **3a** (Entries 1-6) and **5a** (Entries 7-11)

| Entry    | Catalyst                             | Loading/mol% | Time/h     | Solvent                         | T/°C       | Yield / % | Ref.             |
|----------|--------------------------------------|--------------|------------|---------------------------------|------------|-----------|------------------|
| <b>1</b> | <b>BC-Pr</b>                         | <b>0.6</b>   | <b>1.5</b> | <b>EtOH</b>                     | <b>100</b> | <b>95</b> | <b>This work</b> |
| 2        | In-MOF                               | 1            | 10         | EtOH                            | reflux     | 99        | 4                |
| 3        | Nd-MOF                               | 10           | 24         | CH <sub>3</sub> CN              | rt         | 99        | 5                |
| 4        | CoFe <sub>2</sub> O <sub>4</sub> @Pr | 50 mg        | 2          | EtOH                            | reflux     | 92        | 6                |
| 5        | Cu-MOF Nanosheet                     | 5            | 12         | MeOH                            | 70         | 94        | 7                |
| 6        | NiUMo                                | 3            | 2          | CH <sub>3</sub> CN              | 90         | 93        | 8                |
| <b>7</b> | <b>BC-Pr</b>                         | <b>0.6</b>   | <b>1.5</b> | <b>EtOH</b>                     | <b>100</b> | <b>88</b> | <b>This work</b> |
| 8        | In-MOF                               | 5            | 24         | EtOH                            | reflux     | 84        | 5                |
| 9        | CAN-SiO <sub>2</sub>                 | 5            | 0.15       | Toluene                         | rt         | 94        | 9                |
| 10       | Amberlyst-15                         | 10           | 0.5        | H <sub>2</sub> O                | ultrasound | 92        | 10               |
| 11       | Sc(OTf) <sub>3</sub> / Pybox         | 10 / 20      | 24         | CH <sub>2</sub> Cl <sub>2</sub> | -40        | 66        | 11               |

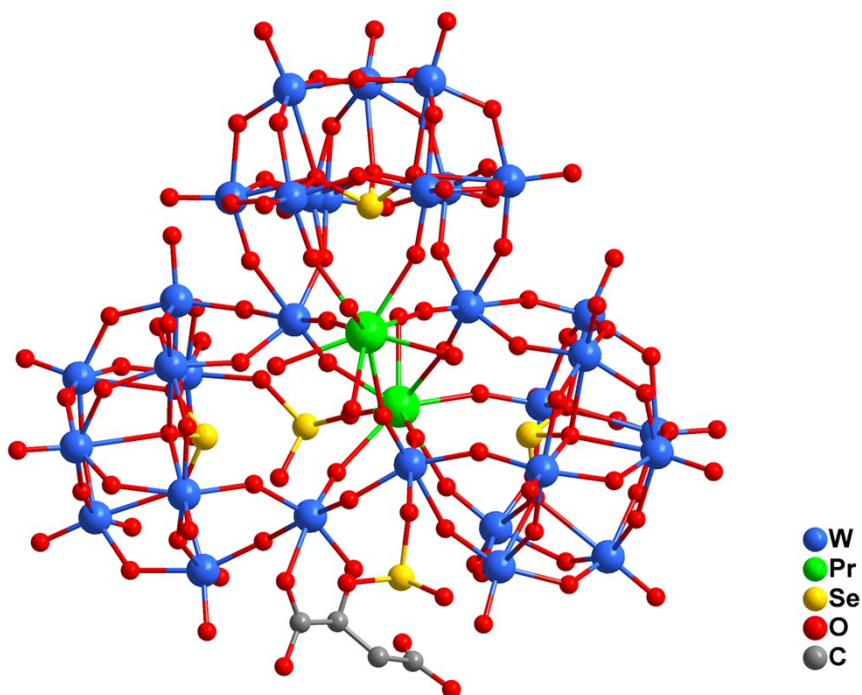

Figure S1. The structure of BC-Pr.

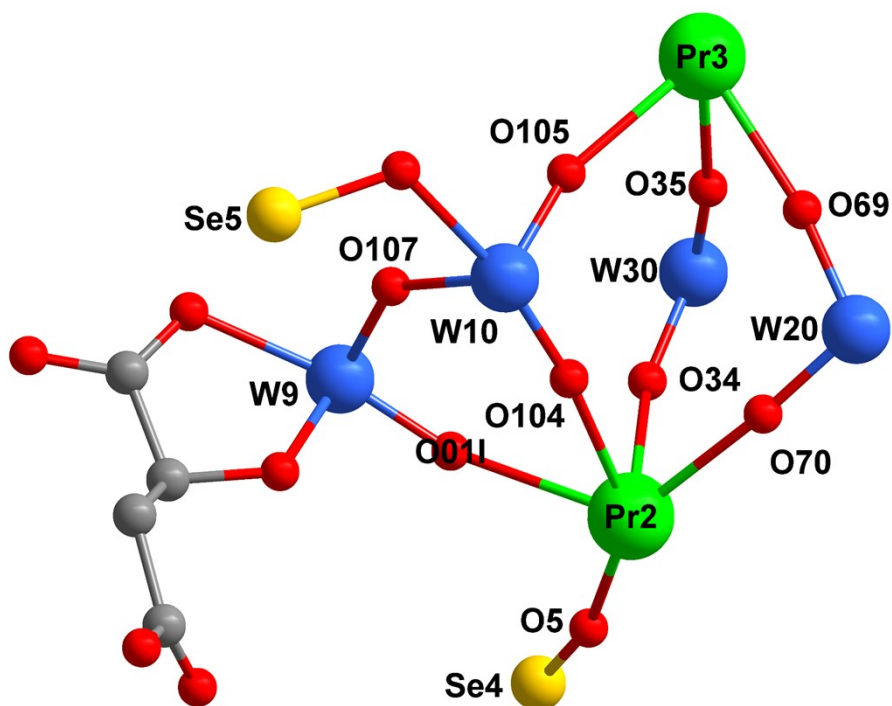

Figure S2. The structure of BC-Pr.

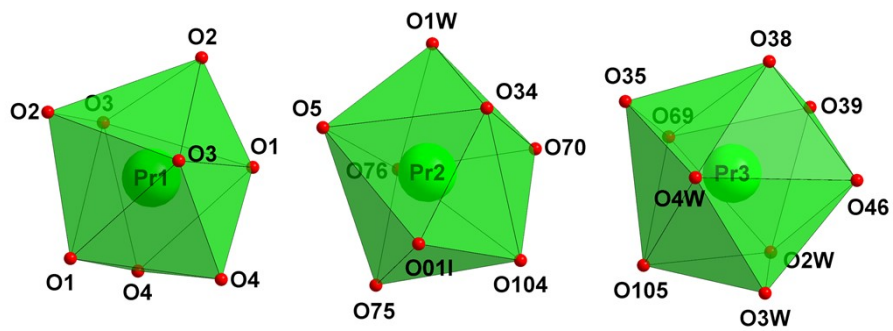

Figure S3. The coordination environment of Pr1, Pr2 and Pr3.

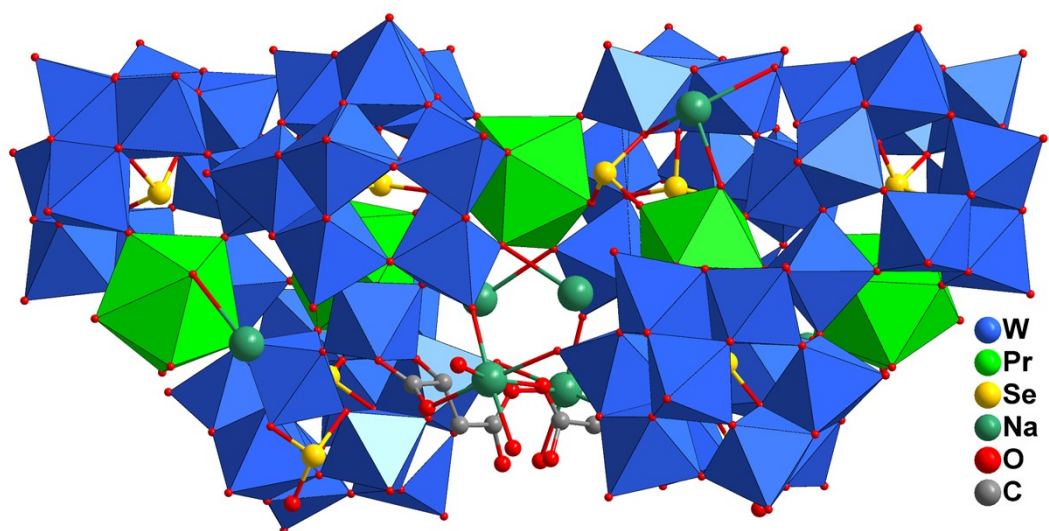

Figure S4. The dimer constructed by two clovers.

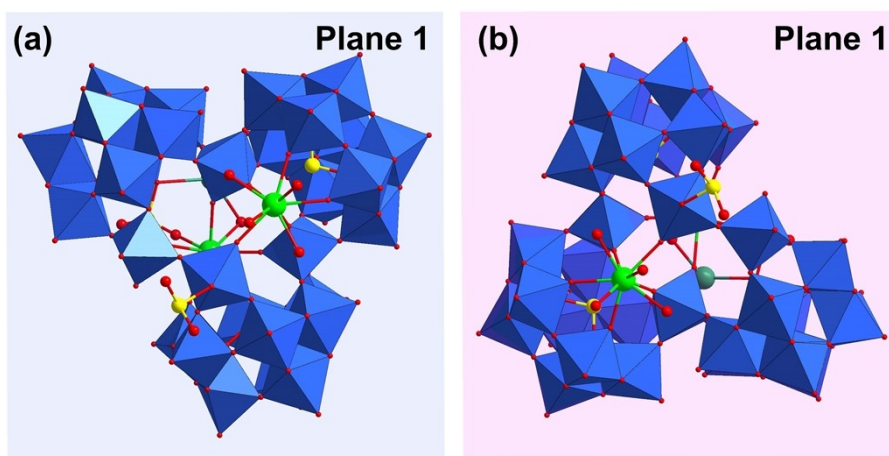

Figure S5. The planes constructed in BC-Pr.

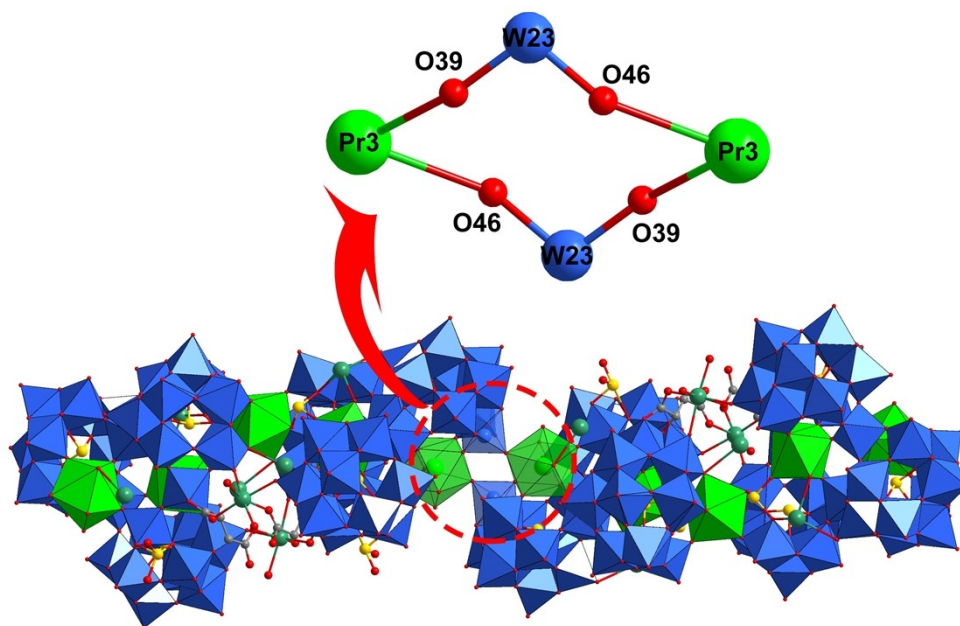

**Figure S6.** The connected mode in 1D chain.

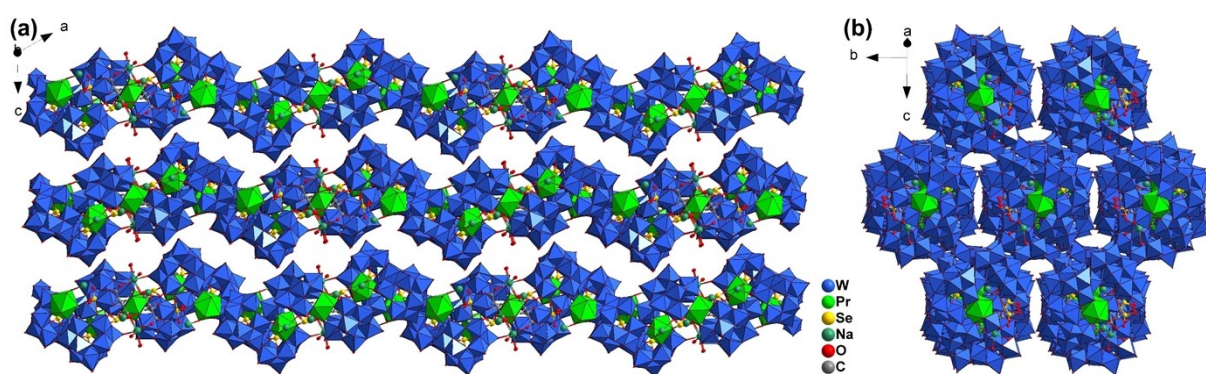

**Figure S7.** The three-dimensional supramolecular structure of **BC-Pr** from different directions.



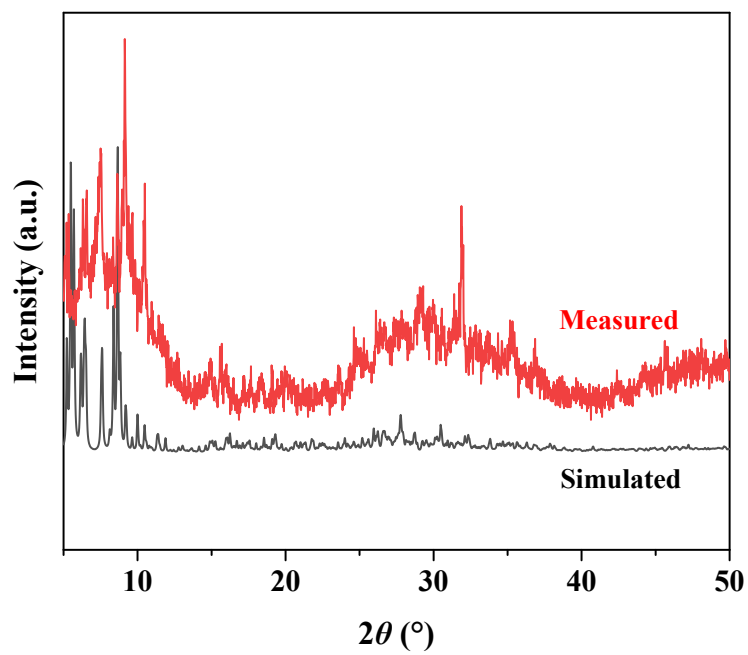

**Figure S8.** XRD pattern of BC-Pr.

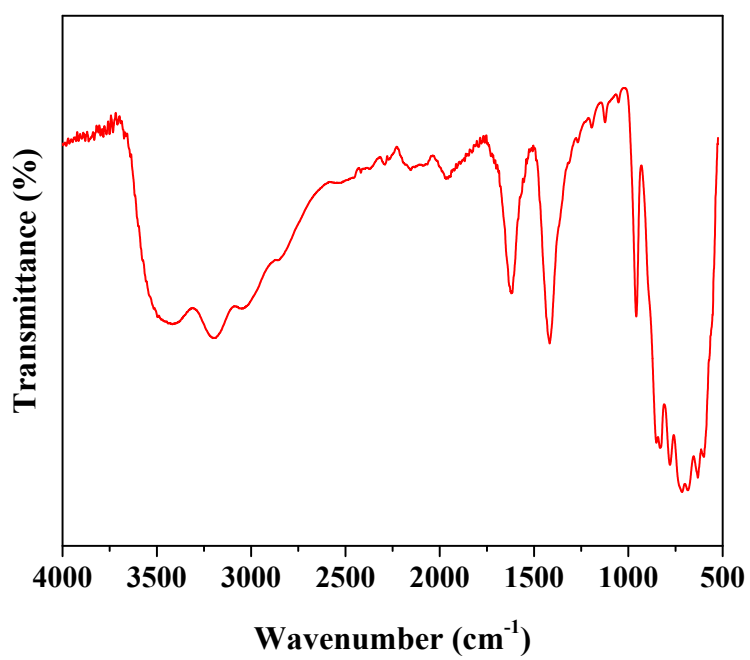

**Figure S9.** IR spectrum of BC-Pr.

#### 4. Characterization of Products<sup>4</sup>

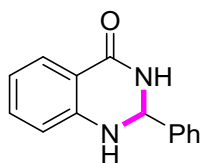

##### 2-phenyl-2,3-dihydroquinazolin-4(1H)-one (3a)

EI-MS: C<sub>14</sub>H<sub>12</sub>N<sub>2</sub>O, m/z (%) = 223.9 (44%) [M<sup>+</sup>].

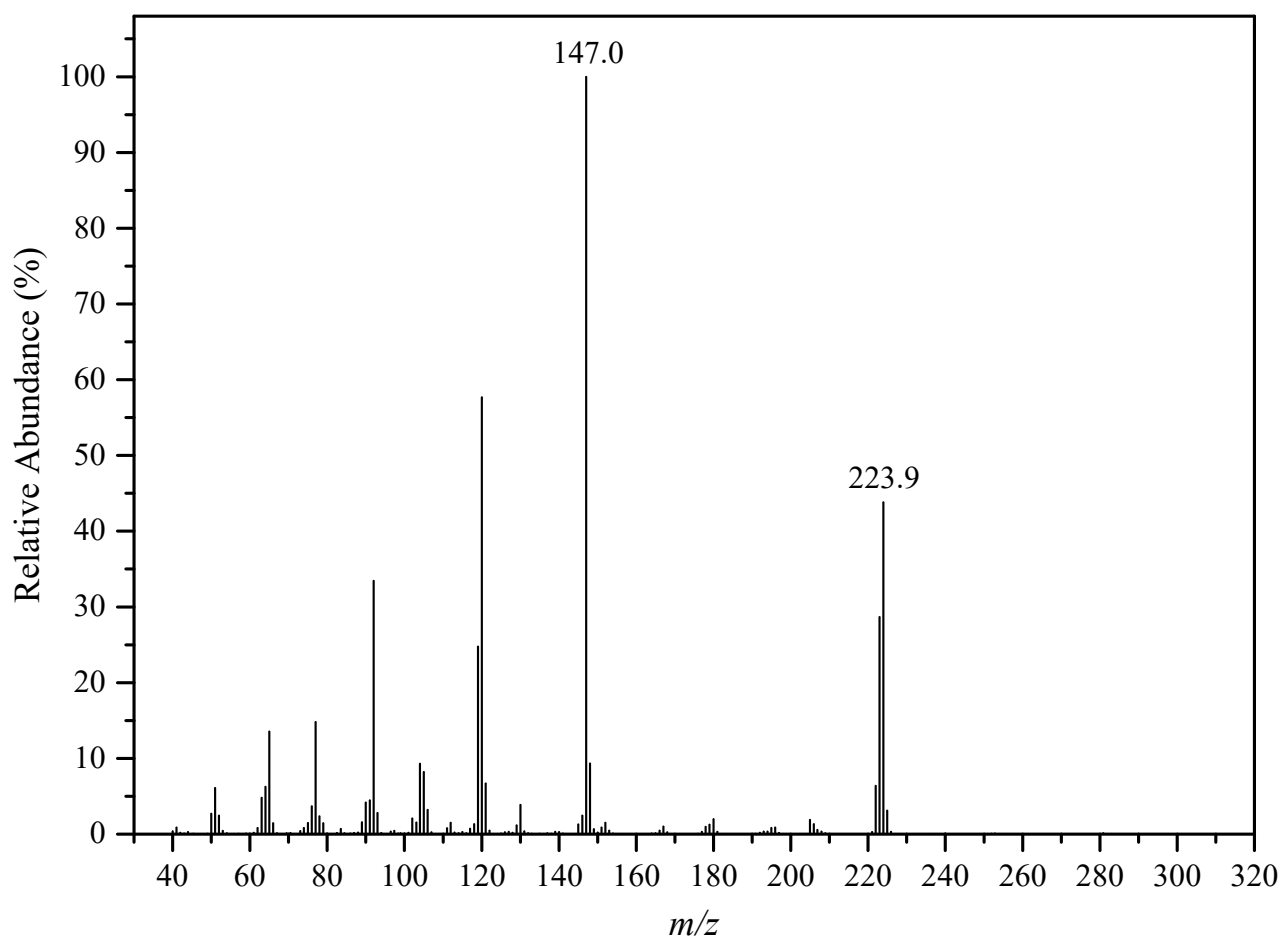

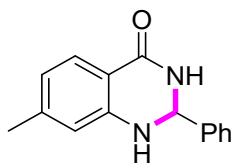

**7-methyl-2-phenyl-2,3-dihydroquinazolin-4(1H)-one (3b)**

**EI-MS:** C<sub>15</sub>H<sub>14</sub>N<sub>2</sub>O, m/z (%) = 238.0 (43%) [M<sup>+</sup>].

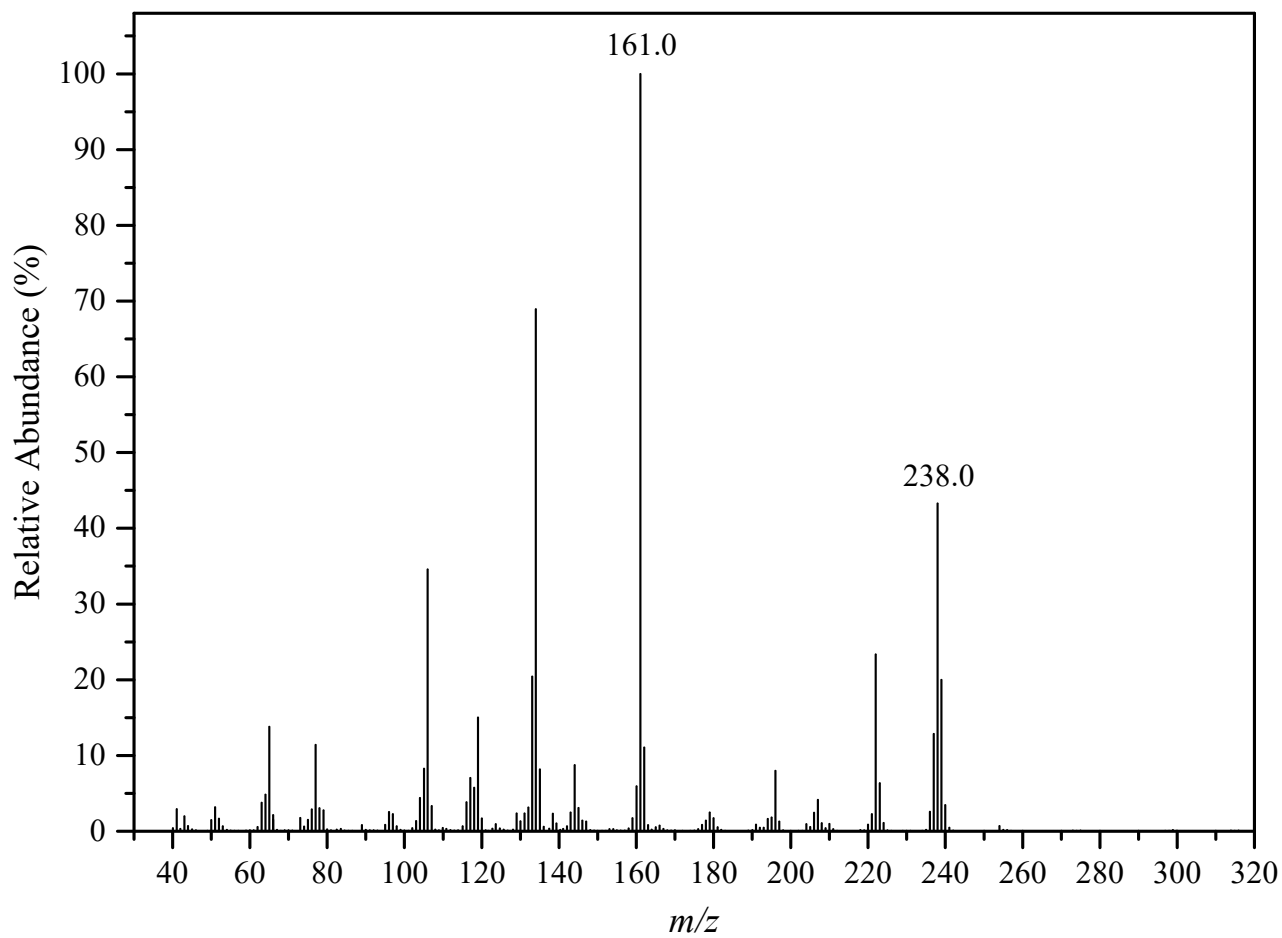

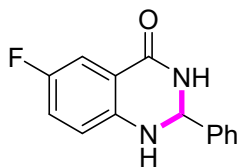

**6-fluoro-2-phenyl-2,3-dihydroquinazolin-4(1H)-one (3c)**

**EI-MS:** C<sub>14</sub>H<sub>11</sub>FN<sub>2</sub>O, m/z (%) = 242.0 (31%) [M<sup>+</sup>].

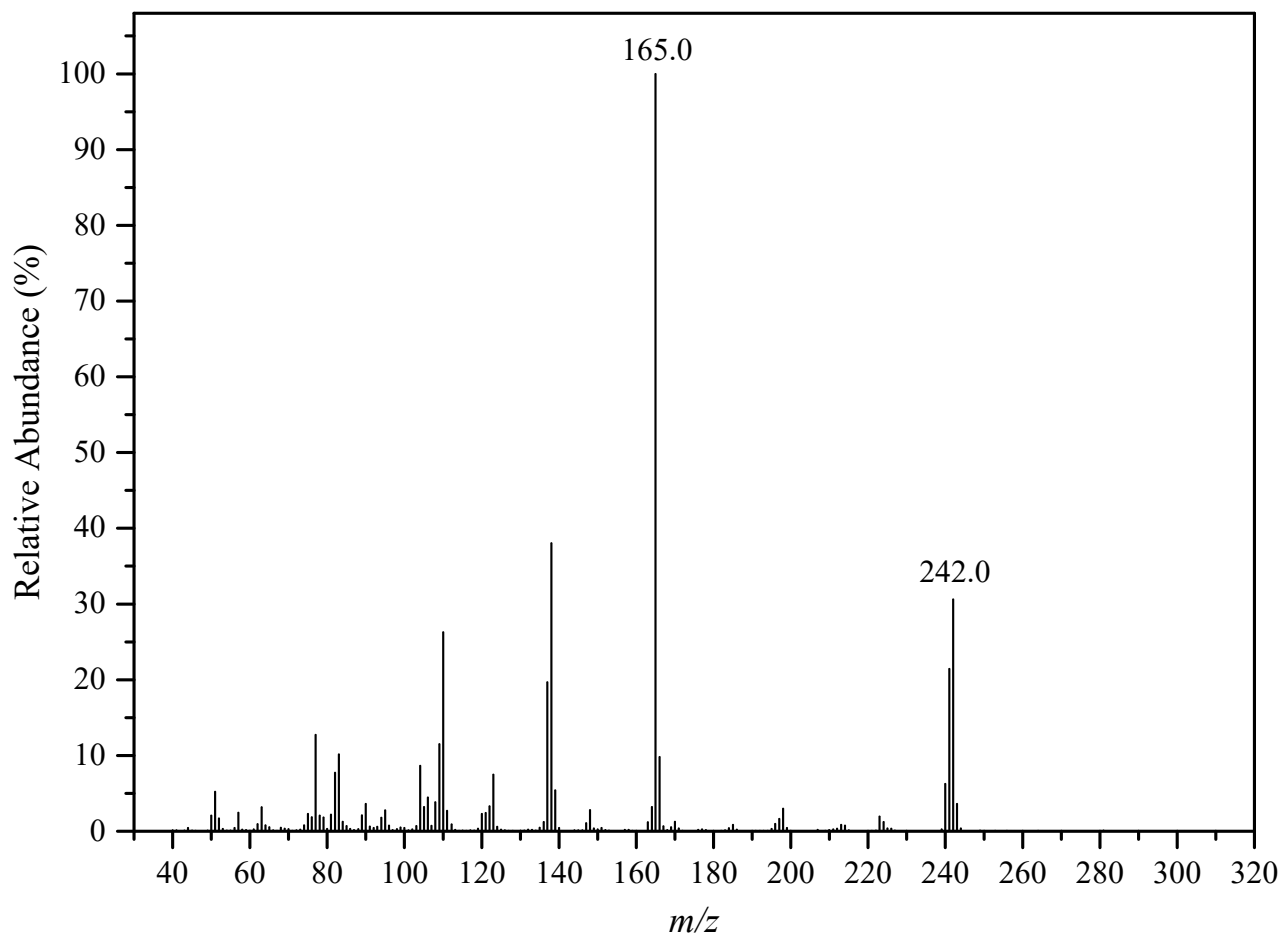

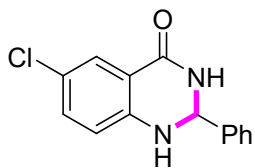

**6-chloro-2-phenyl-2,3-dihydroquinazolin-4(1H)-one (3d)**

**EI-MS:** C<sub>14</sub>H<sub>11</sub>ClN<sub>2</sub>O, m/z (%) = 258.0 (24%) [M<sup>+</sup>].

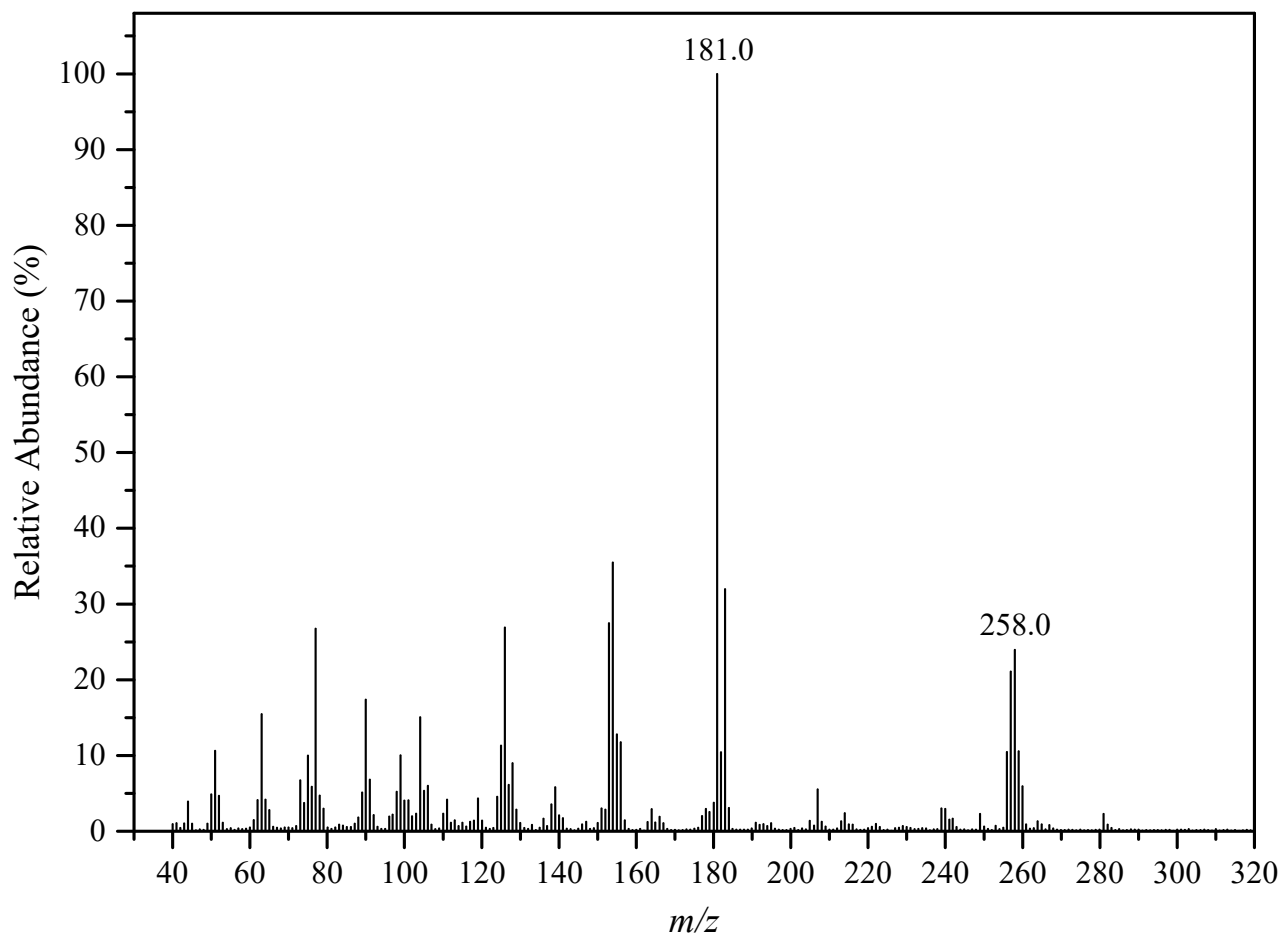

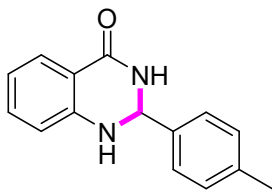

2-(*p*-tolyl)-2,3-dihydroquinazolin-4(1*H*)-one (3e)

EI-MS: C<sub>15</sub>H<sub>14</sub>N<sub>2</sub>O, *m/z* (%) = 238.0 (50%) [M<sup>+</sup>].

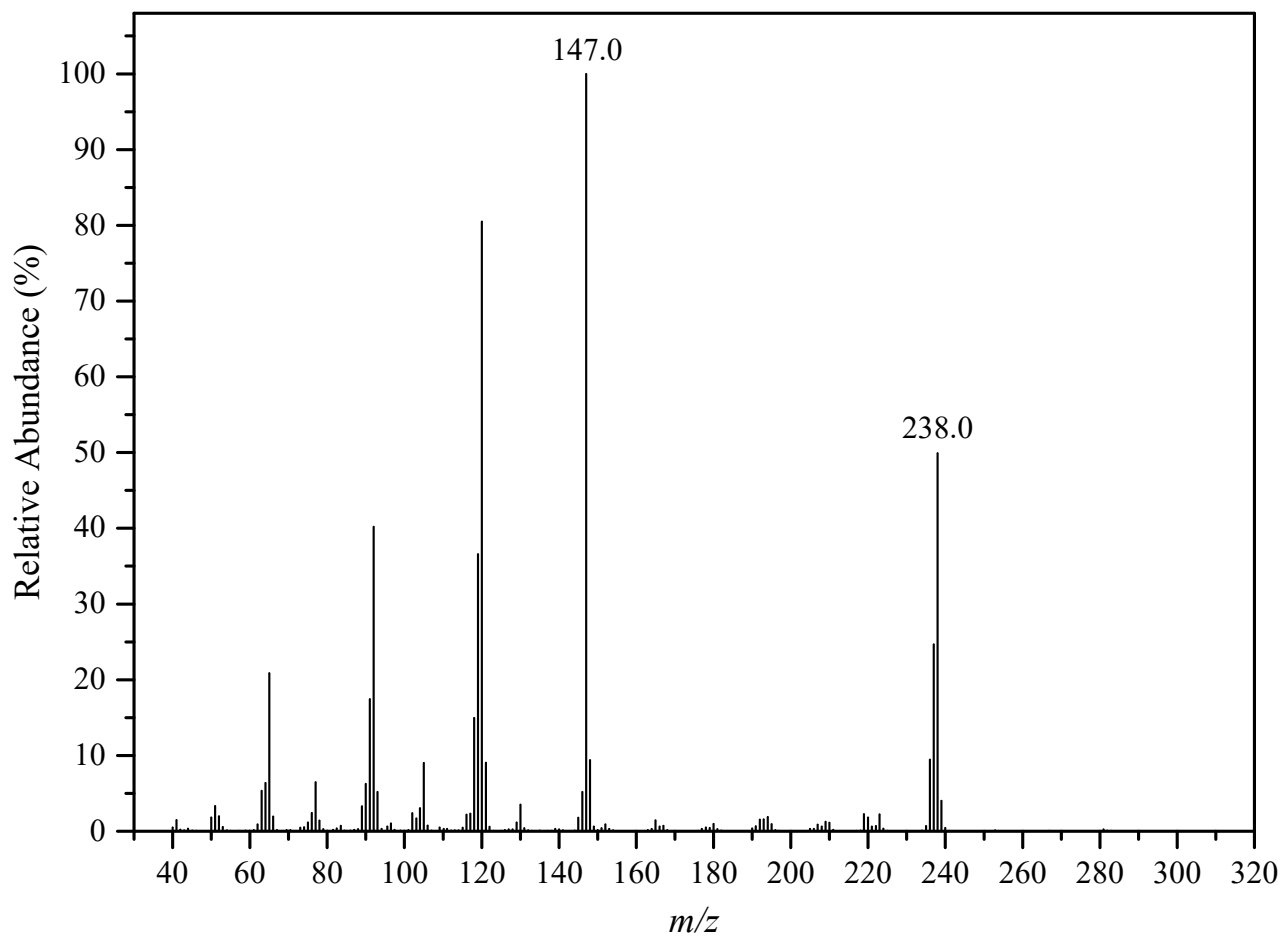

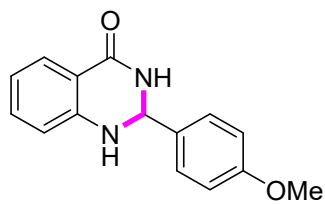

**2-(4-methoxyphenyl)-2,3-dihydroquinazolin-4(1H)-one (3f)**

**EI-MS:** C<sub>15</sub>H<sub>14</sub>N<sub>2</sub>O<sub>2</sub>, m/z (%) = 254.0 (48%) [M<sup>+</sup>].

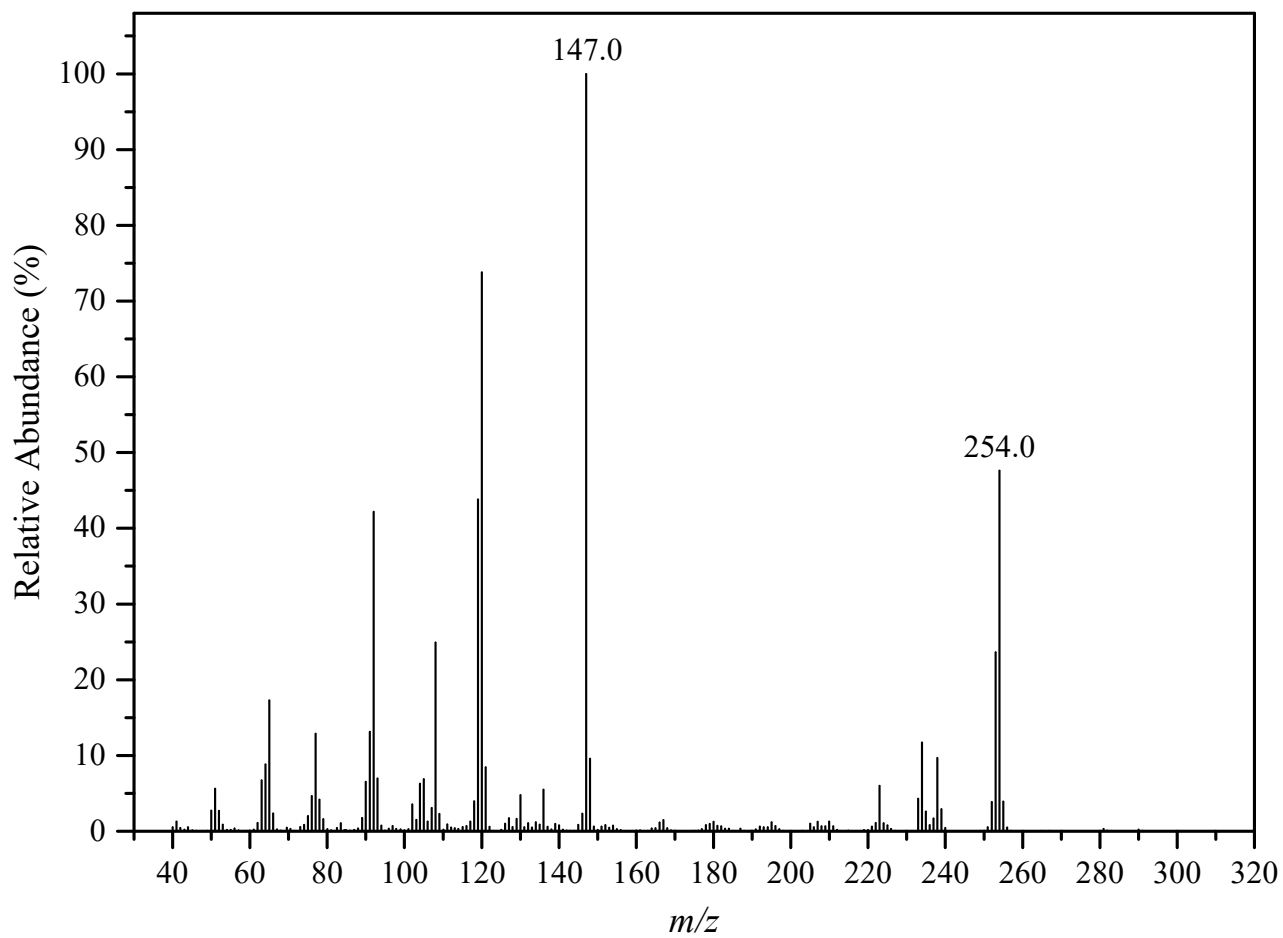

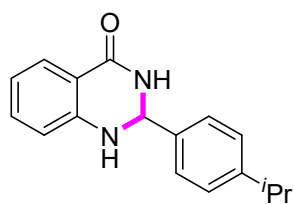

**2-(4-isopropylphenyl)-2,3-dihydroquinazolin-4(1H)-one (3g)**

**EI-MS:** C<sub>17</sub>H<sub>18</sub>N<sub>2</sub>O, m/z (%) = 266.0 (39%) [M<sup>+</sup>].

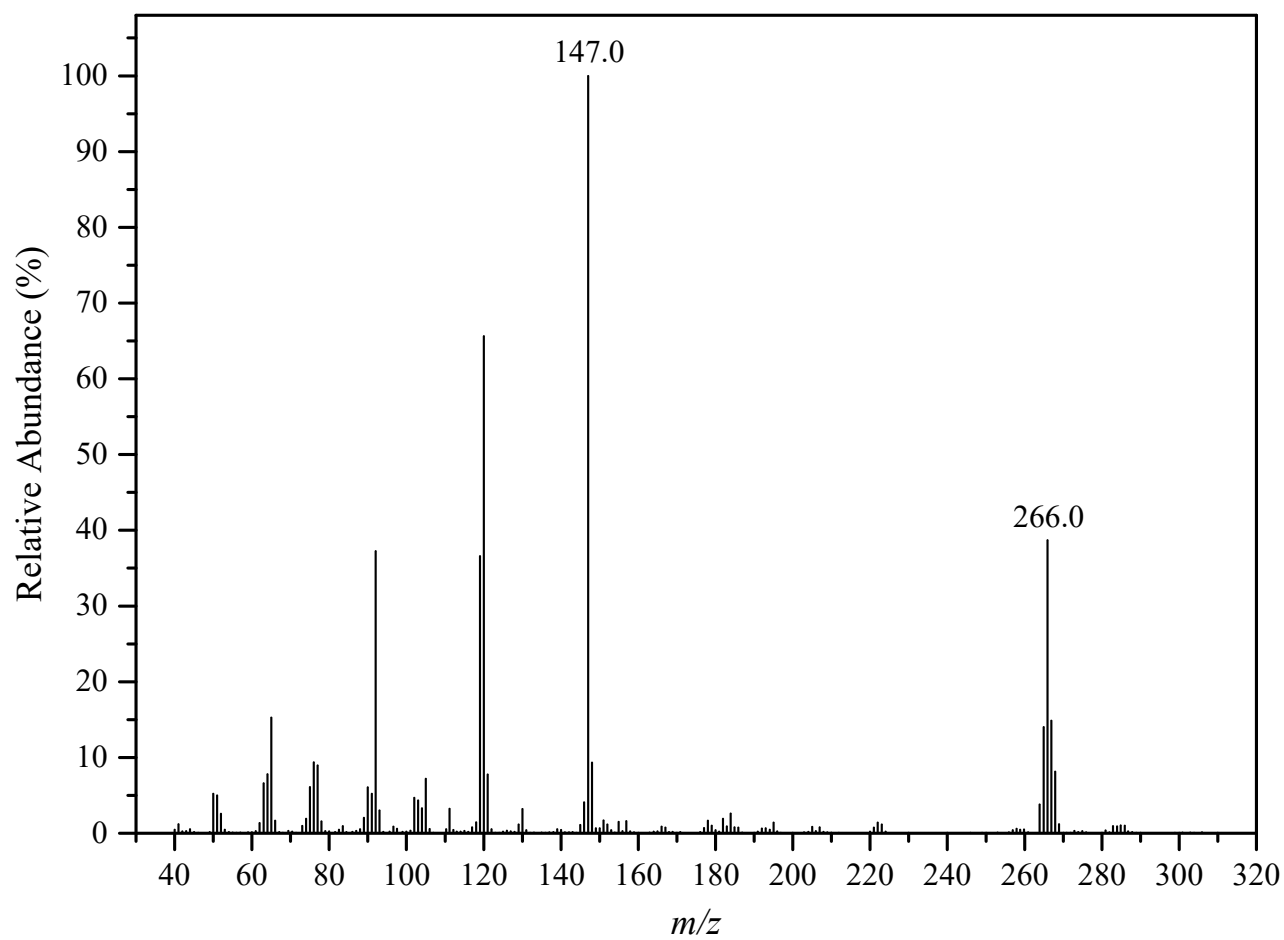



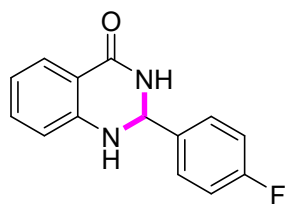

**2-(4-fluorophenyl)-2,3-dihydroquinazolin-4(1H)-one (3h)**

**EI-MS:** C<sub>14</sub>H<sub>11</sub>FN<sub>2</sub>O, m/z (%) = 242.0 (36%) [M<sup>+</sup>].

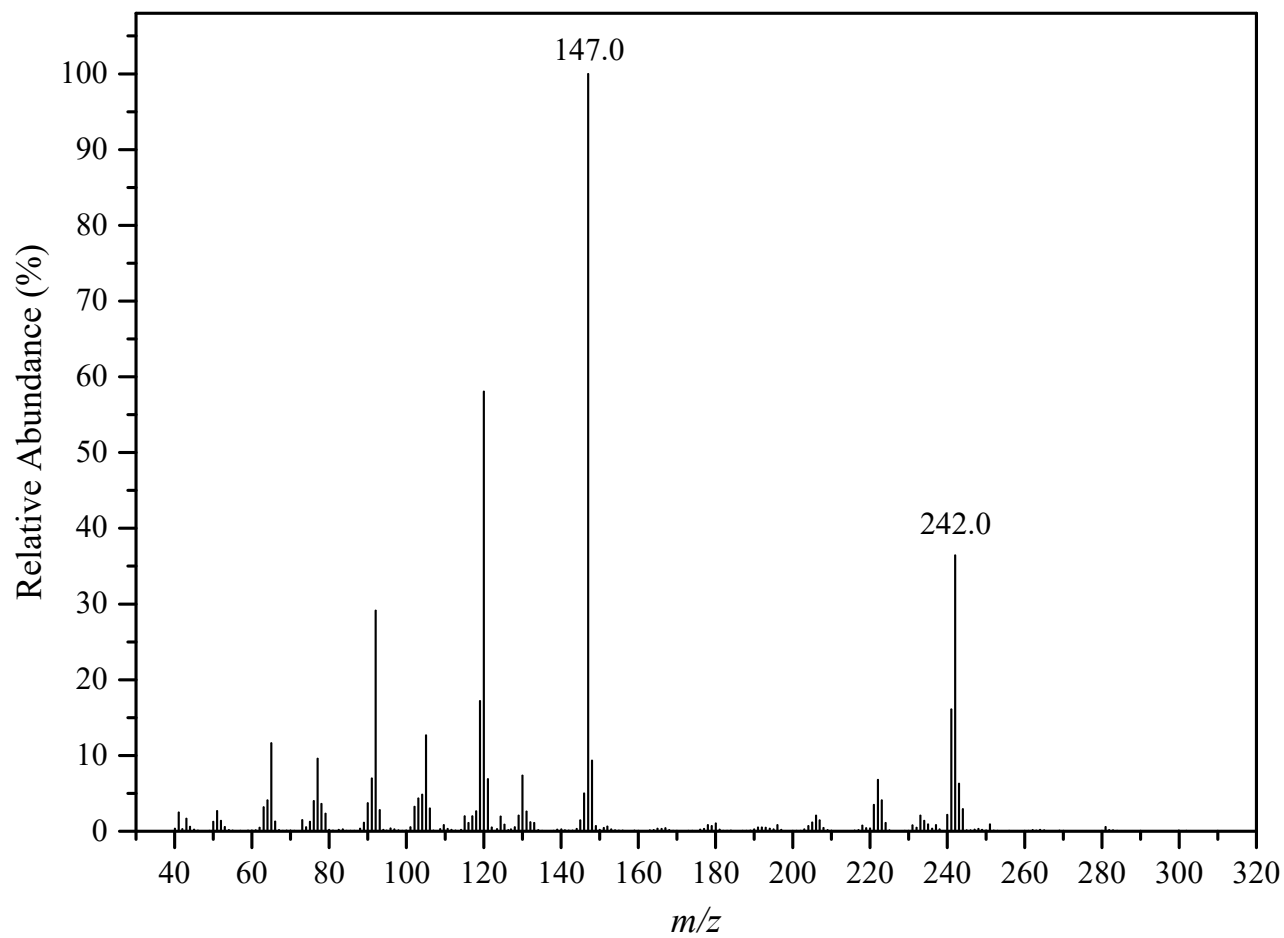

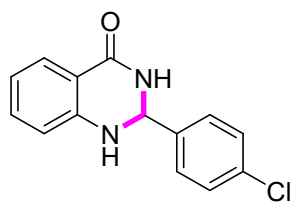

**2-(4-chlorophenyl)-2,3-dihydroquinazolin-4(1H)-one (3i)**

**EI-MS:** C<sub>14</sub>H<sub>11</sub>ClN<sub>2</sub>O, m/z (%) = 258.0 (18%) [M<sup>+</sup>].

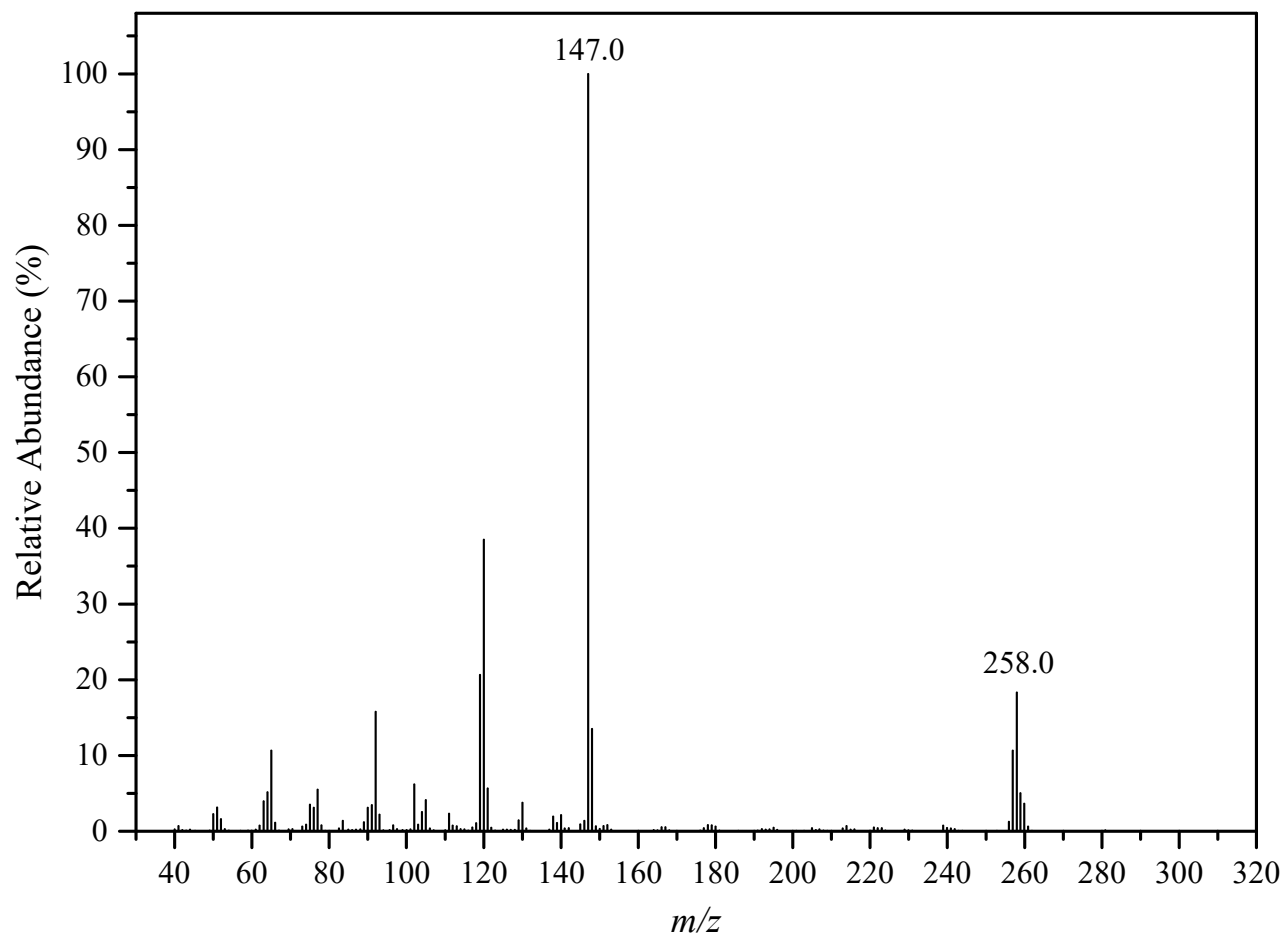

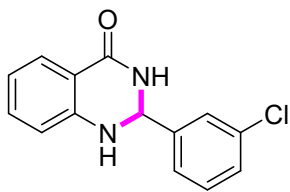

**2-(3-chlorophenyl)-2,3-dihydroquinazolin-4(1H)-one (3j)**

**EI-MS:** C<sub>14</sub>H<sub>11</sub>ClN<sub>2</sub>O, m/z (%) = 258.0 (22%) [M<sup>+</sup>].

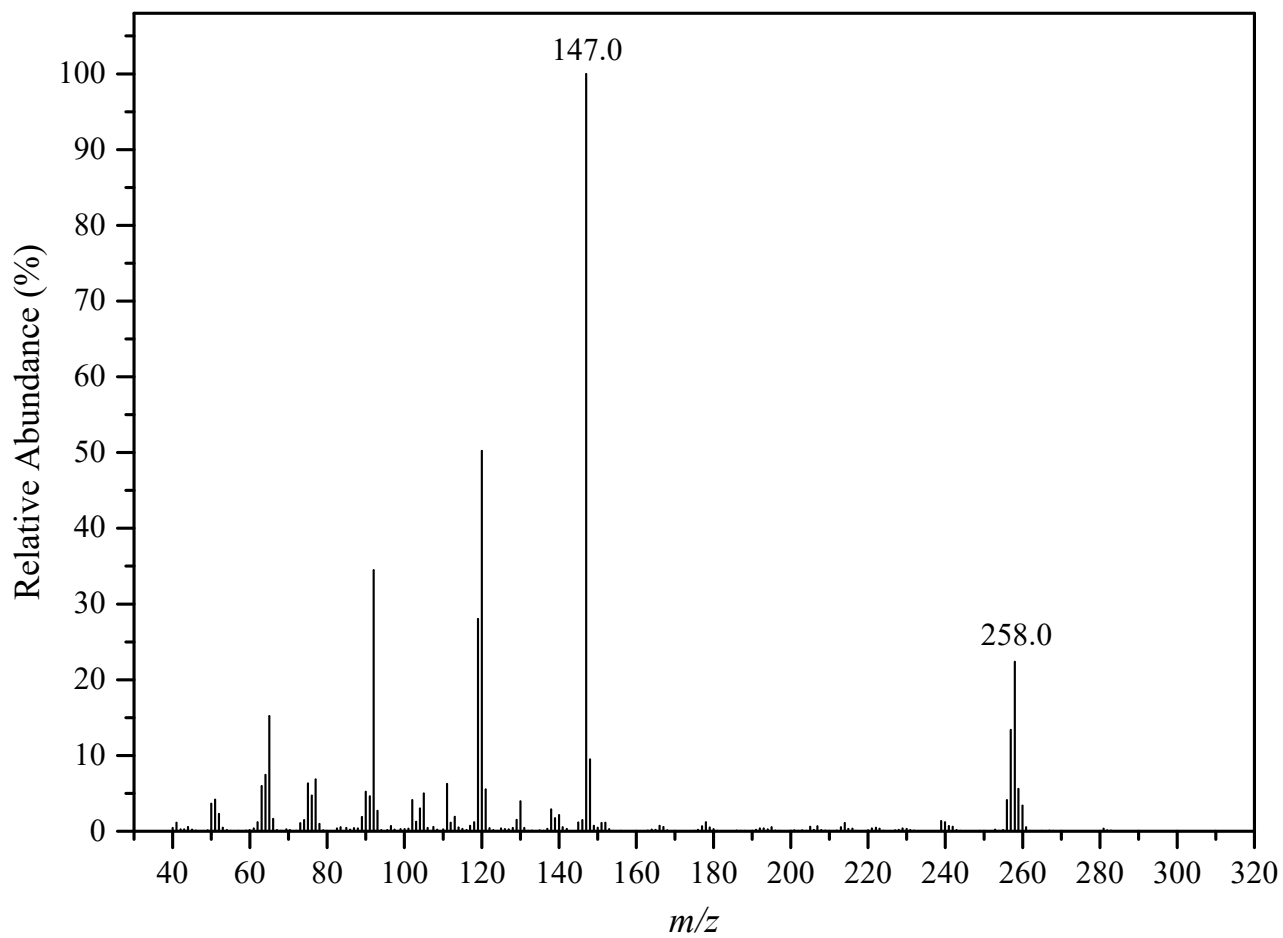

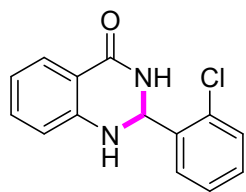

**2-(2-chlorophenyl)-2,3-dihydroquinazolin-4(1H)-one (3k)**

**EI-MS:** C<sub>14</sub>H<sub>11</sub>ClN<sub>2</sub>O, m/z (%) = 258.0 (22%) [M<sup>+</sup>].

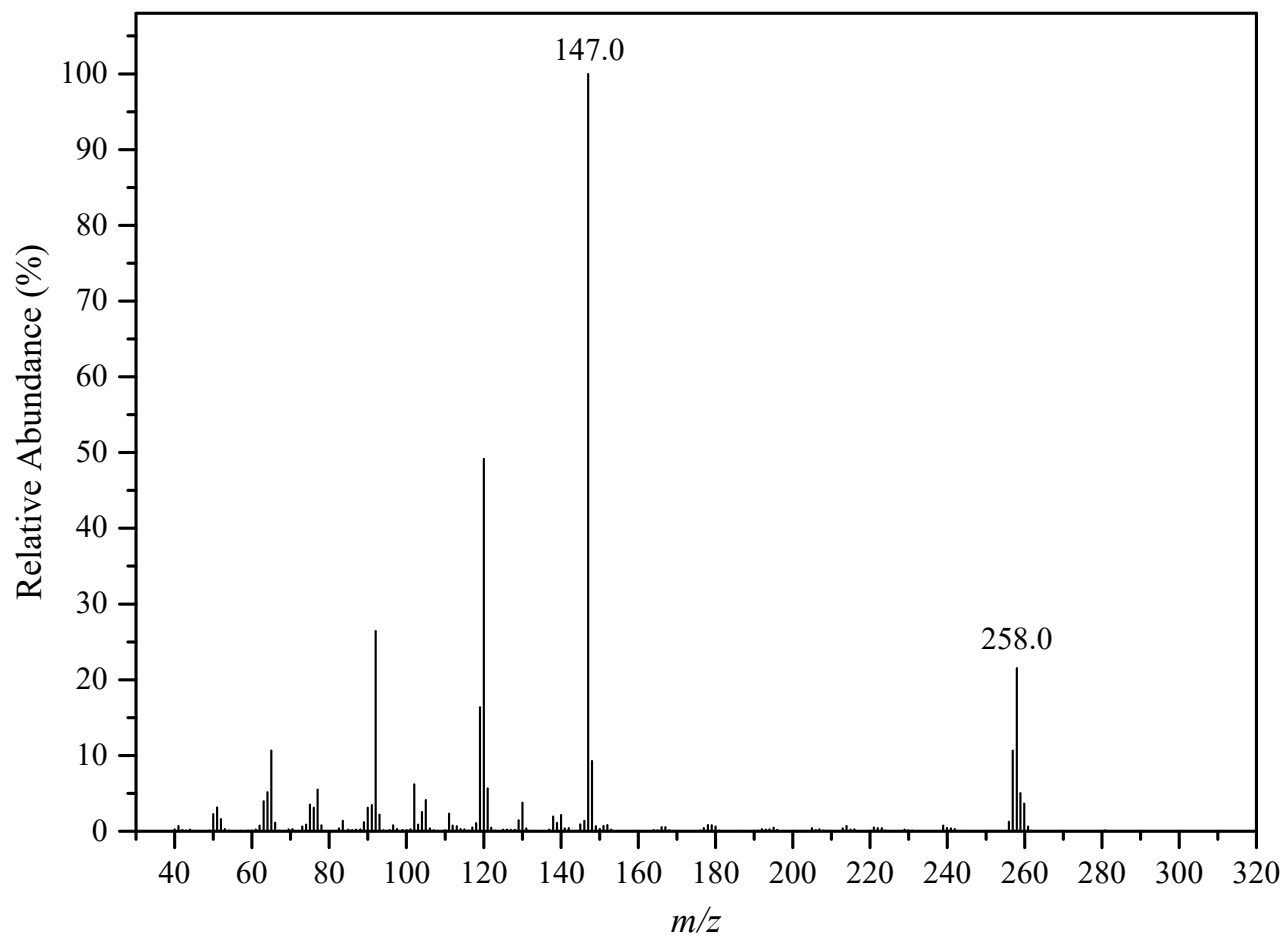

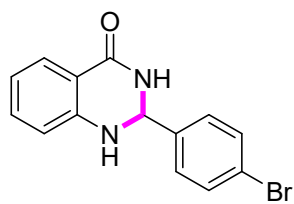

**2-(4-bromophenyl)-2,3-dihydroquinazolin-4(1H)-one (31)**

**EI-MS:** C<sub>14</sub>H<sub>11</sub>BrN<sub>2</sub>O, m/z (%) = 302.0 (37%) [M<sup>+</sup>].

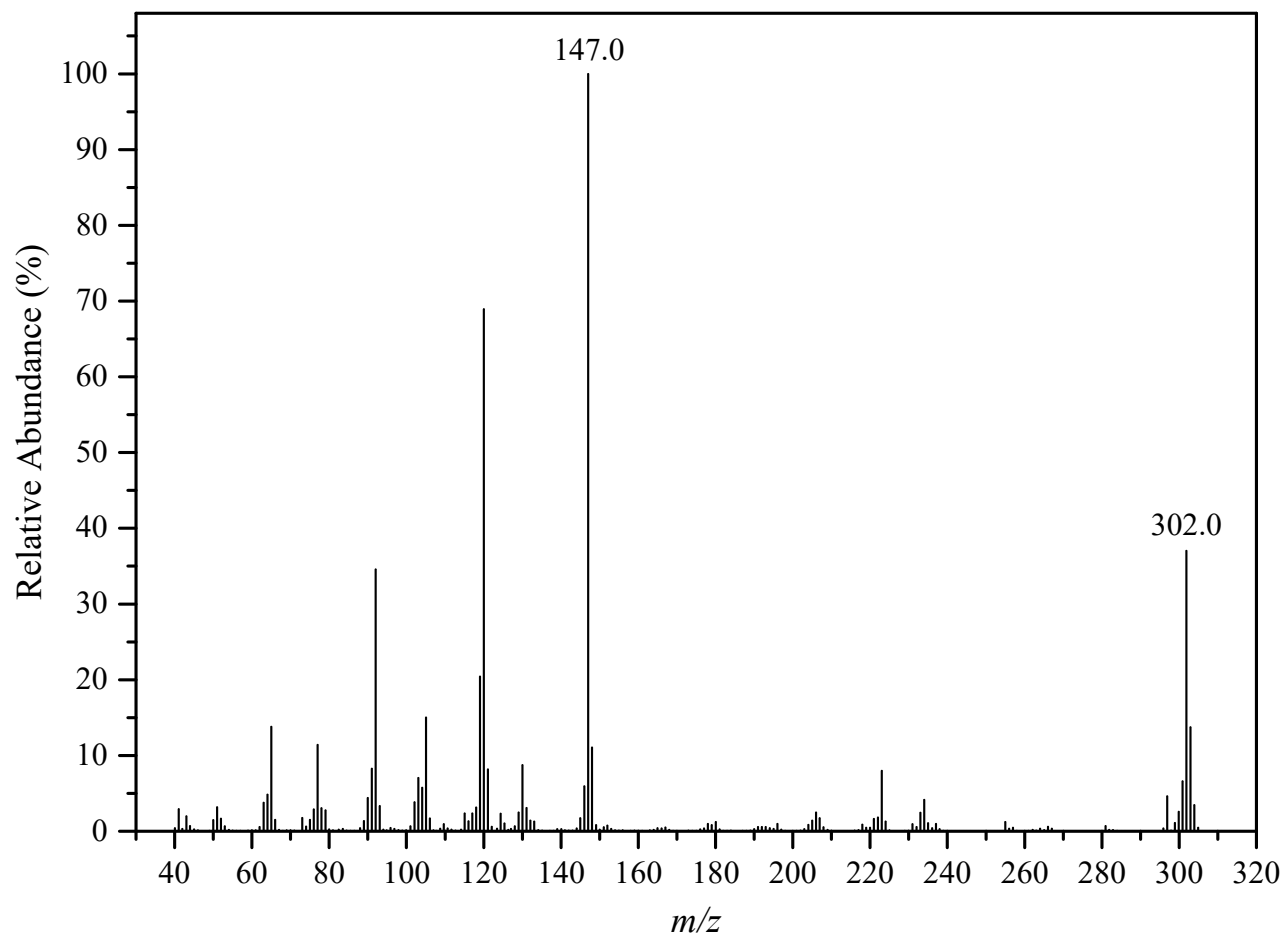

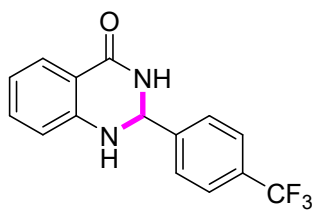

**2-(4-(trifluoromethyl)phenyl)-2,3-dihydroquinazolin-4(1H)-one (3m)**

**EI-MS:** C<sub>15</sub>H<sub>11</sub>F<sub>3</sub>N<sub>2</sub>O, m/z (%) = 292.0 (22%) [M<sup>+</sup>].

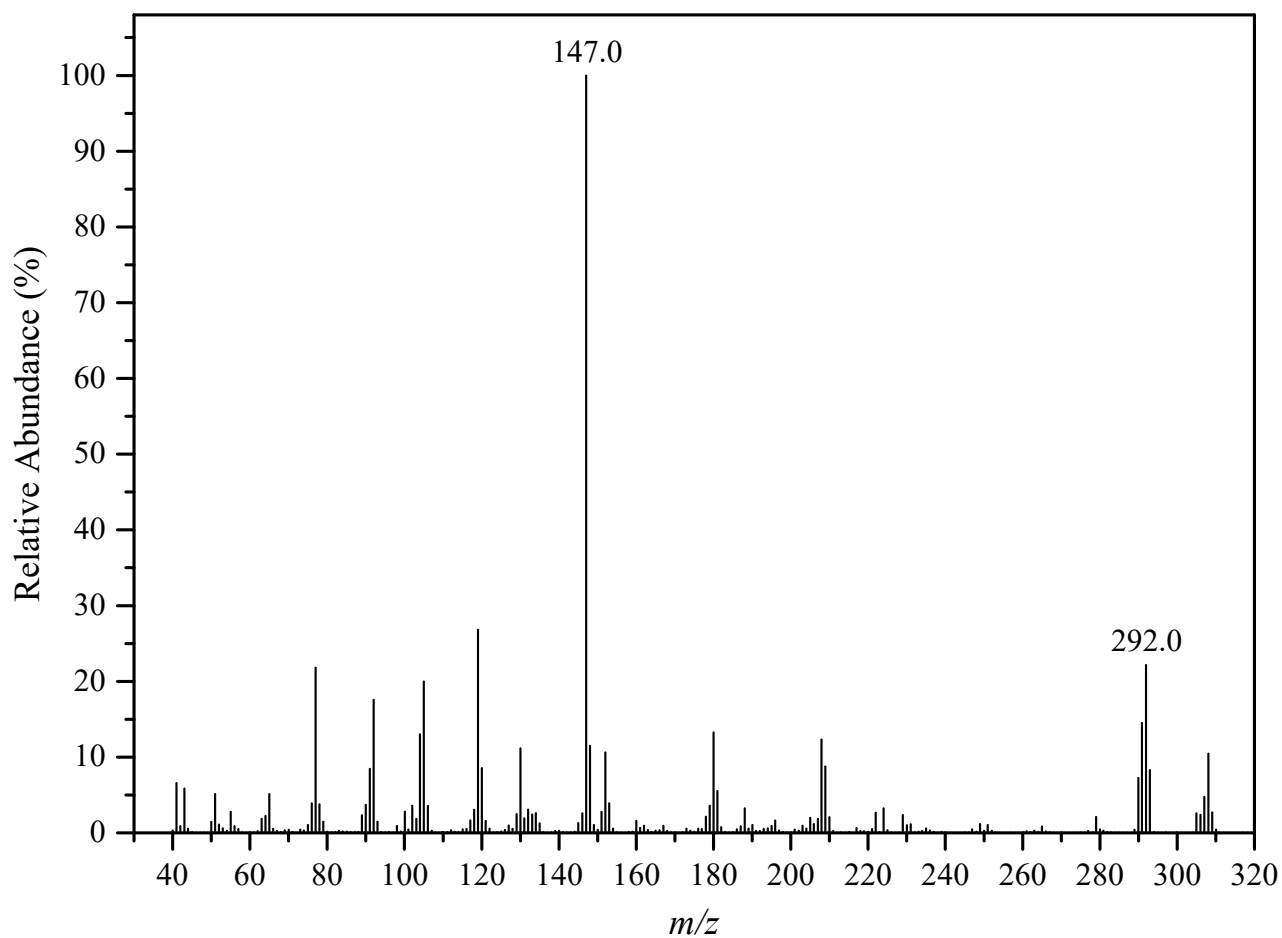

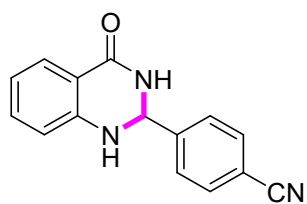

**4-(4-oxo-1,2,3,4-tetrahydroquinazolin-2-yl)benzonitrile (3n)**

**EI-MS:** C<sub>15</sub>H<sub>11</sub>N<sub>3</sub>O, m/z (%) = 249.0 (24%) [M<sup>+</sup>].

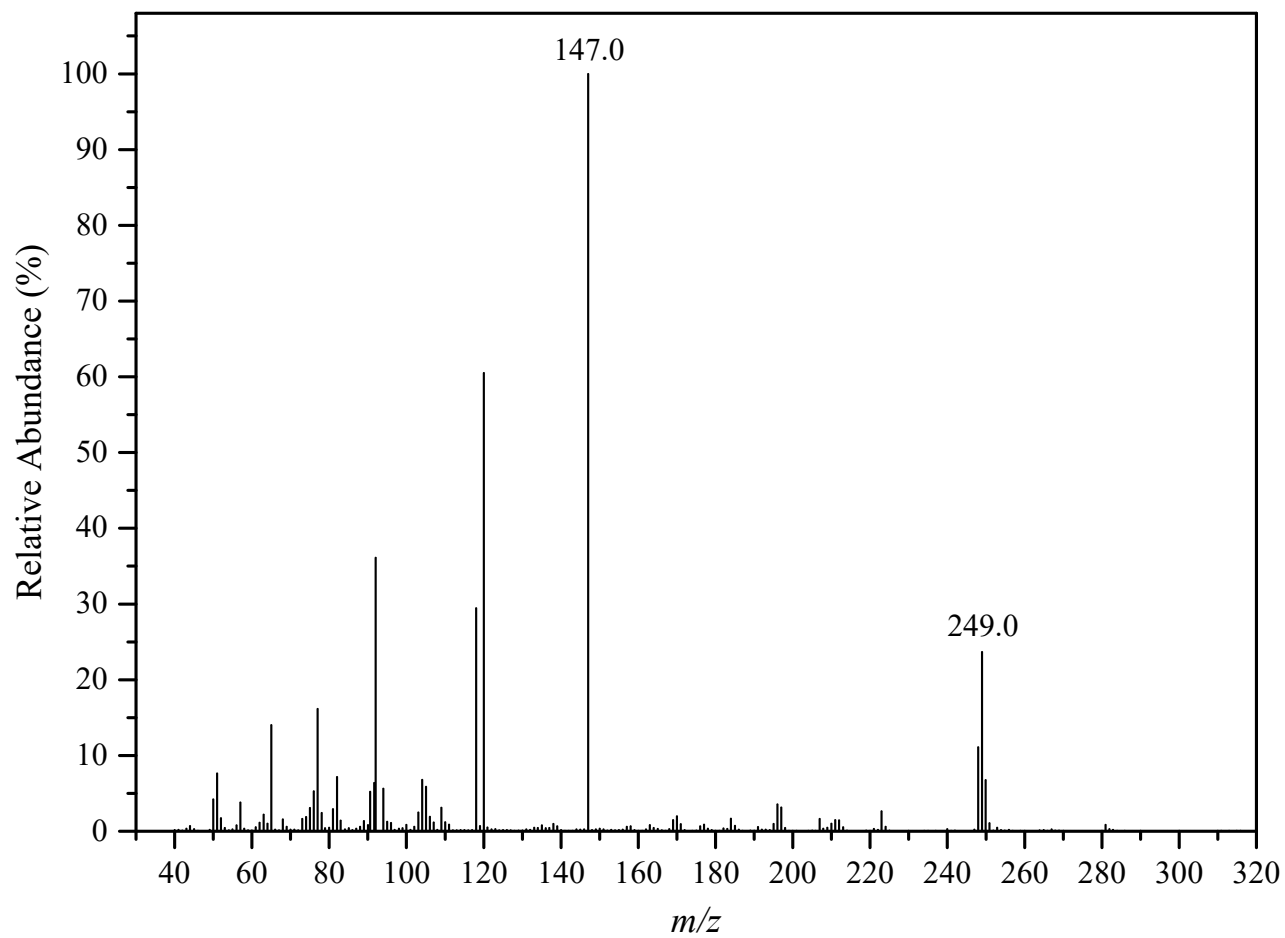

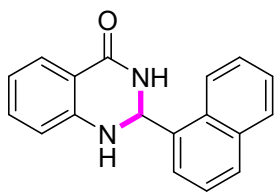

**2-(naphthalen-1-yl)-2,3-dihydroquinazolin-4(1H)-one (3o)**

**EI-MS:** C<sub>18</sub>H<sub>14</sub>N<sub>2</sub>O, m/z (%) = 274.0 (30%) [M<sup>+</sup>].

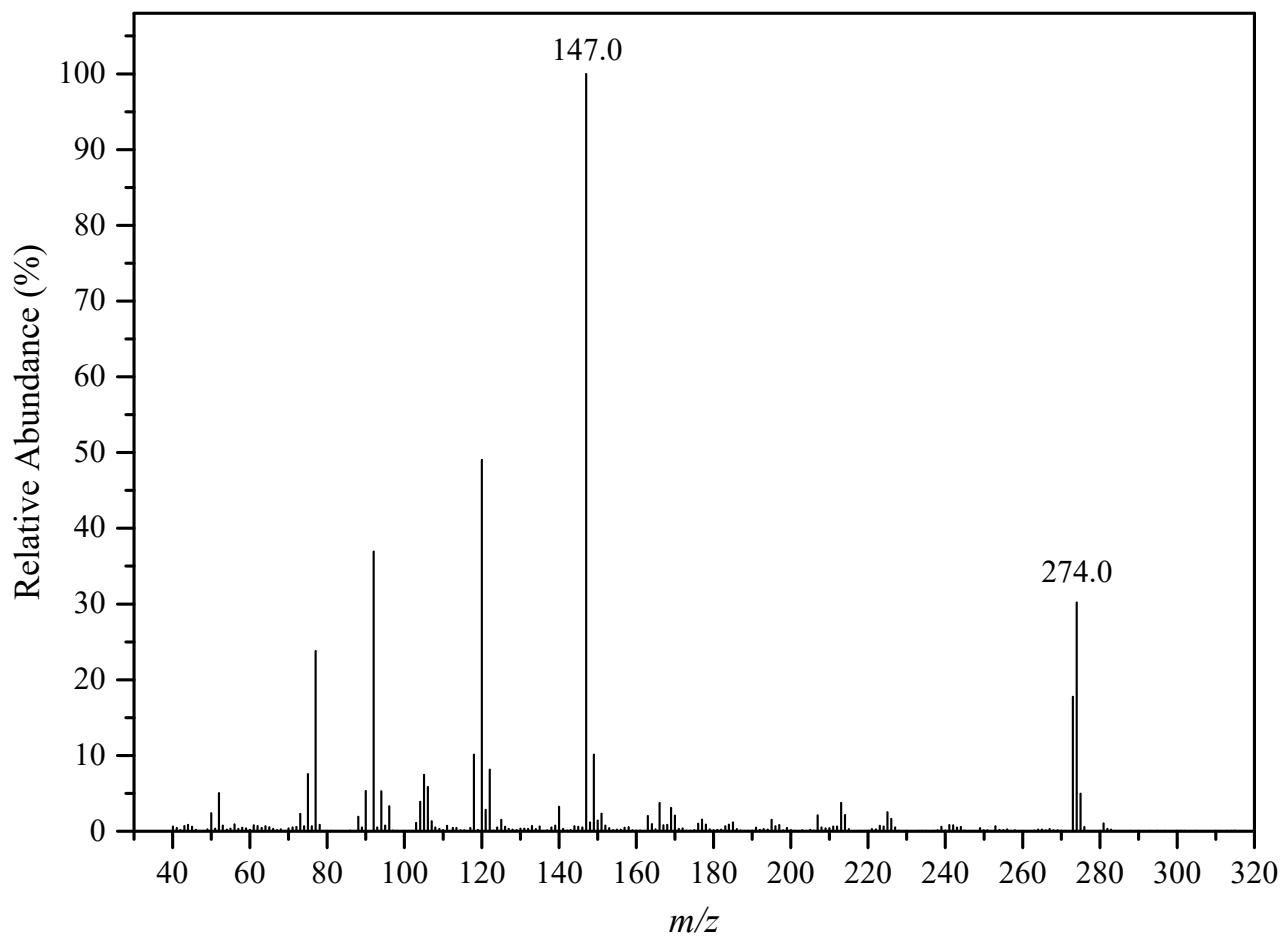



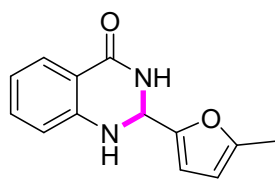

**2-(5-methylfuran-2-yl)-2,3-dihydroquinazolin-4(1H)-one (3p)**

**EI-MS:** C<sub>13</sub>H<sub>12</sub>N<sub>2</sub>O<sub>2</sub>, m/z (%) = 228.0 (31%) [M<sup>+</sup>].

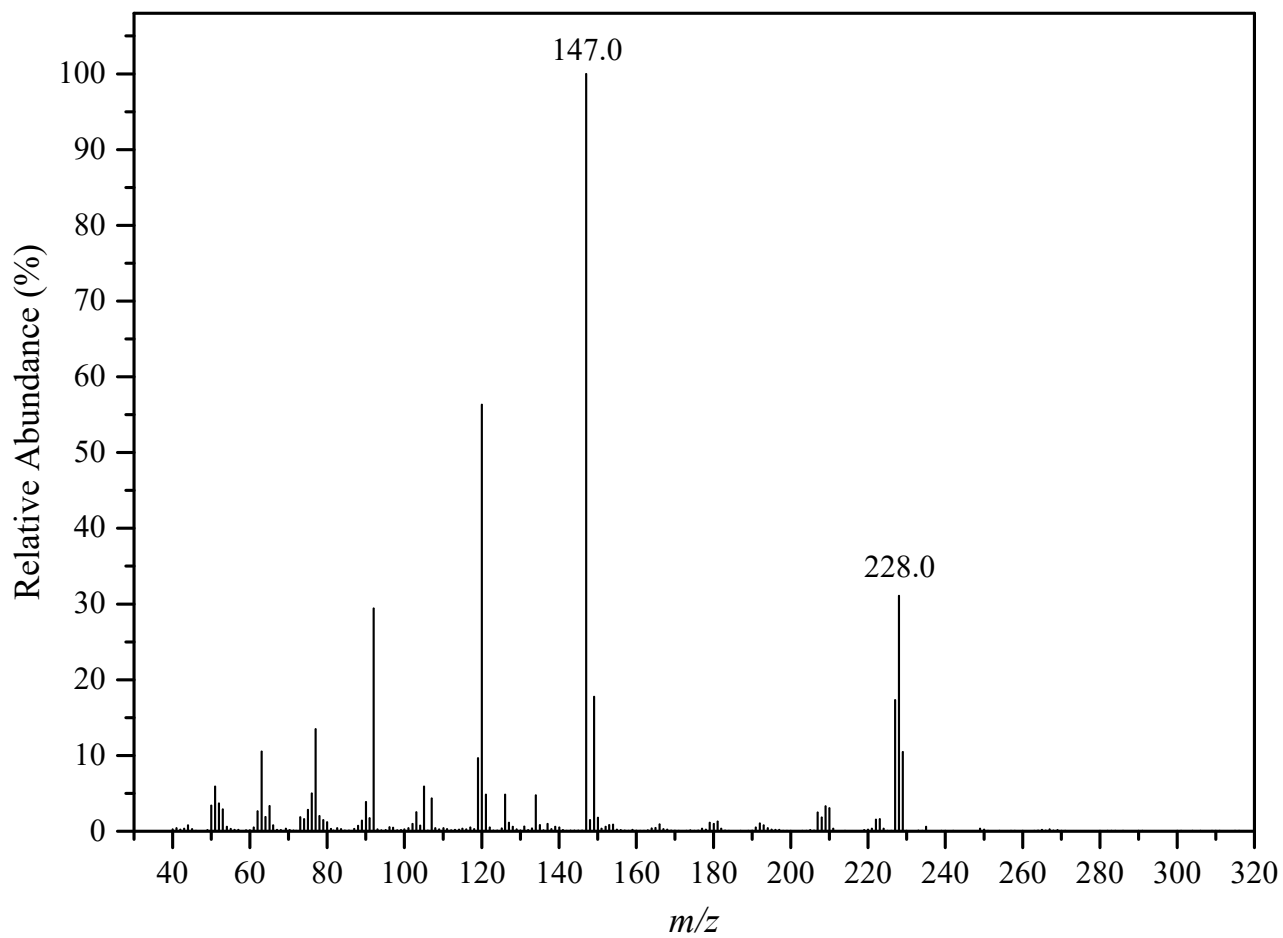

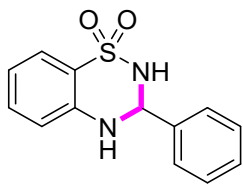

**3-phenyl-3,4-dihydro-2H-benzo[e][1,2,4]thiadiazine 1,1-dioxide (5a)**

EI-MS: C<sub>13</sub>H<sub>12</sub>N<sub>2</sub>O<sub>2</sub>S, m/z (%) = 260.1 (16%) [M<sup>+</sup>].

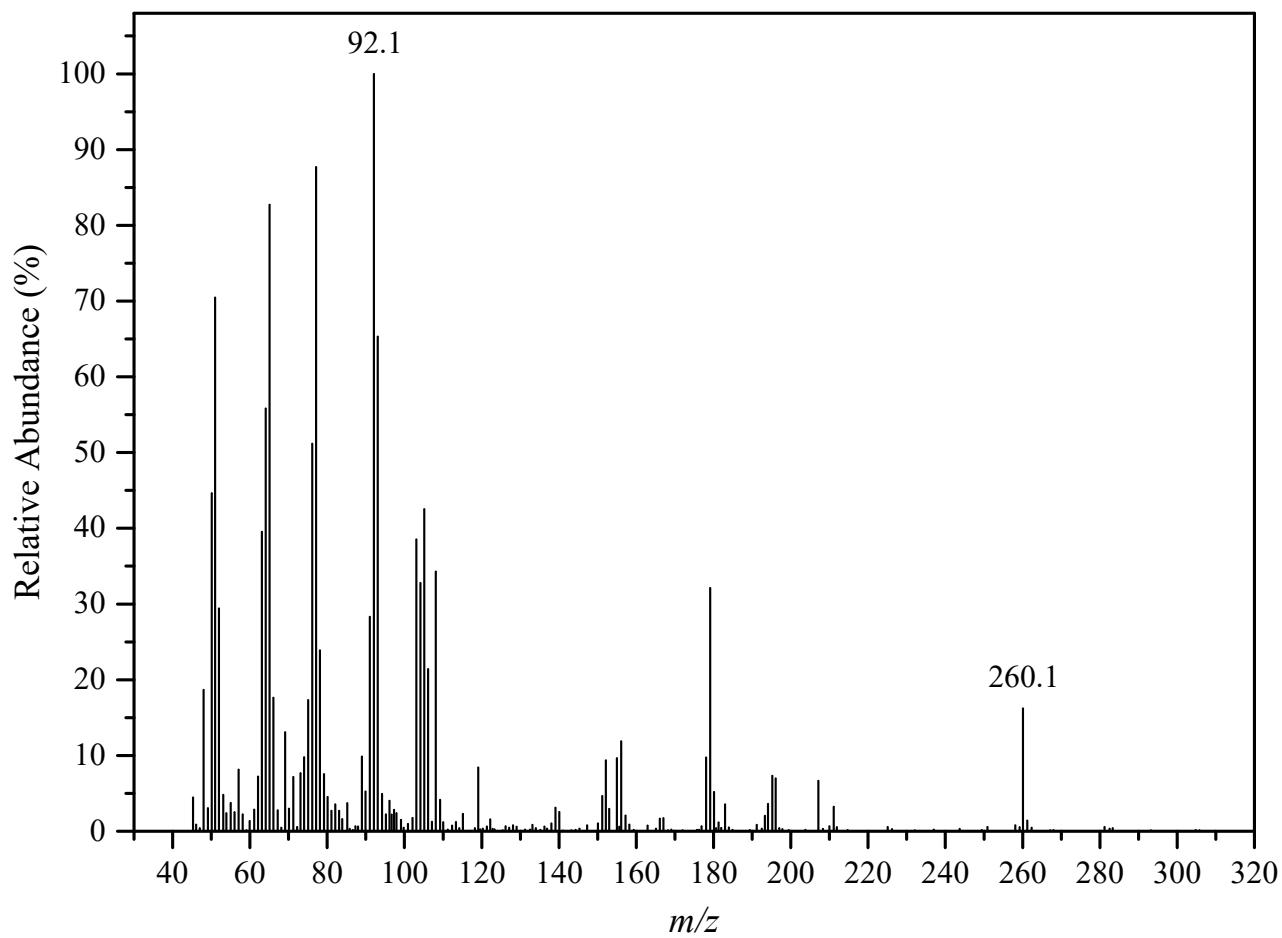

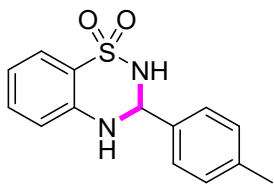

**3-(*o*-tolyl)-3,4-dihydro-2*H*-benzo[e][1,2,4]thiadiazine 1,1-dioxide (5b)**

**EI-MS:** C<sub>14</sub>H<sub>14</sub>N<sub>2</sub>O<sub>2</sub>S, *m/z* (%) = 274.1 (16%) [M<sup>+</sup>].

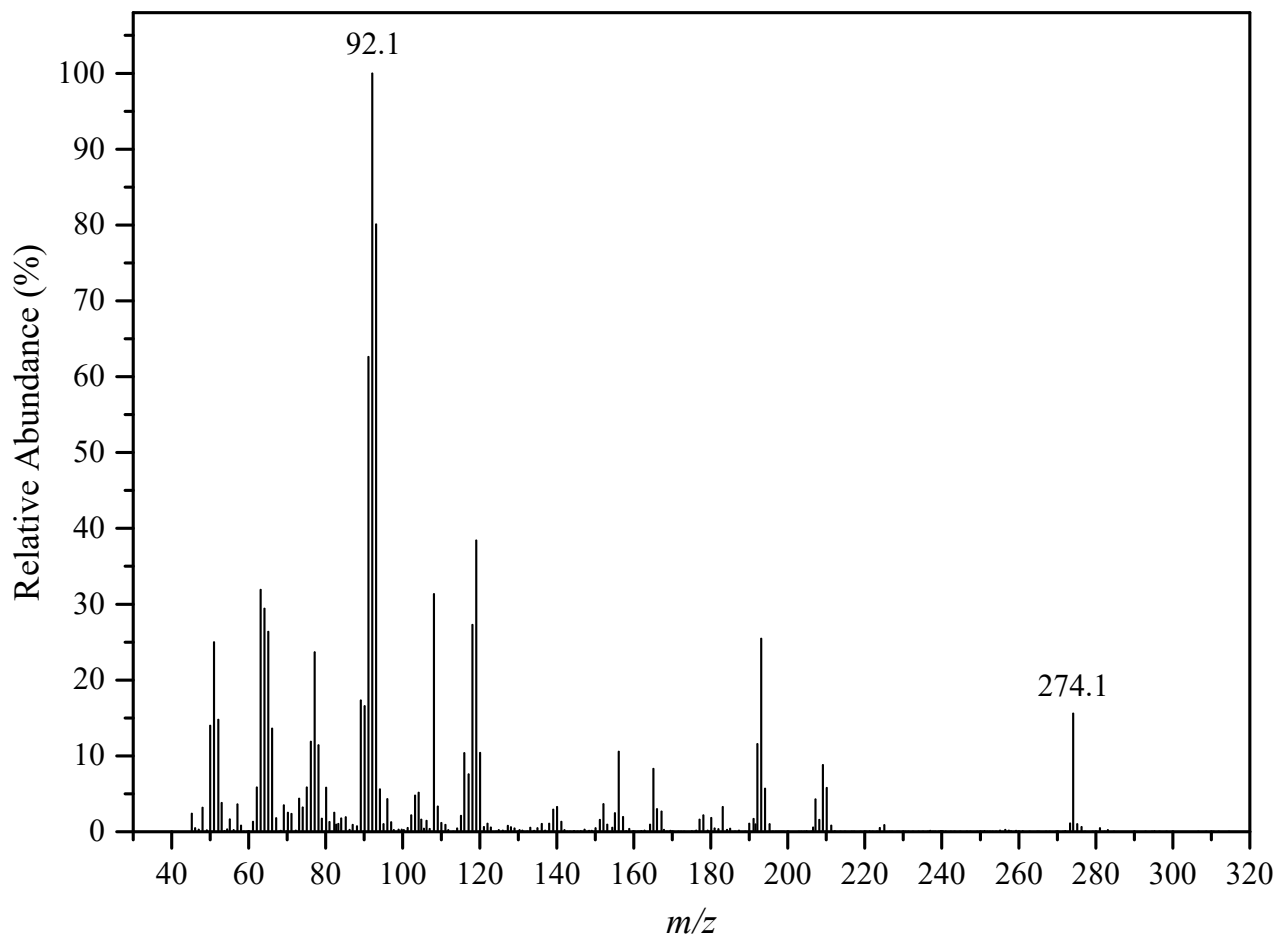

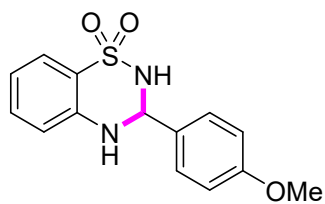

**3-(4-methoxyphenyl)-3,4-dihydro-2H-benzo[e][1,2,4]thiadiazine 1,1-dioxide (5c)**

**EI-MS:** C<sub>14</sub>H<sub>14</sub>N<sub>2</sub>O<sub>3</sub>S, m/z (%) = 290.1 (11%) [M<sup>+</sup>].

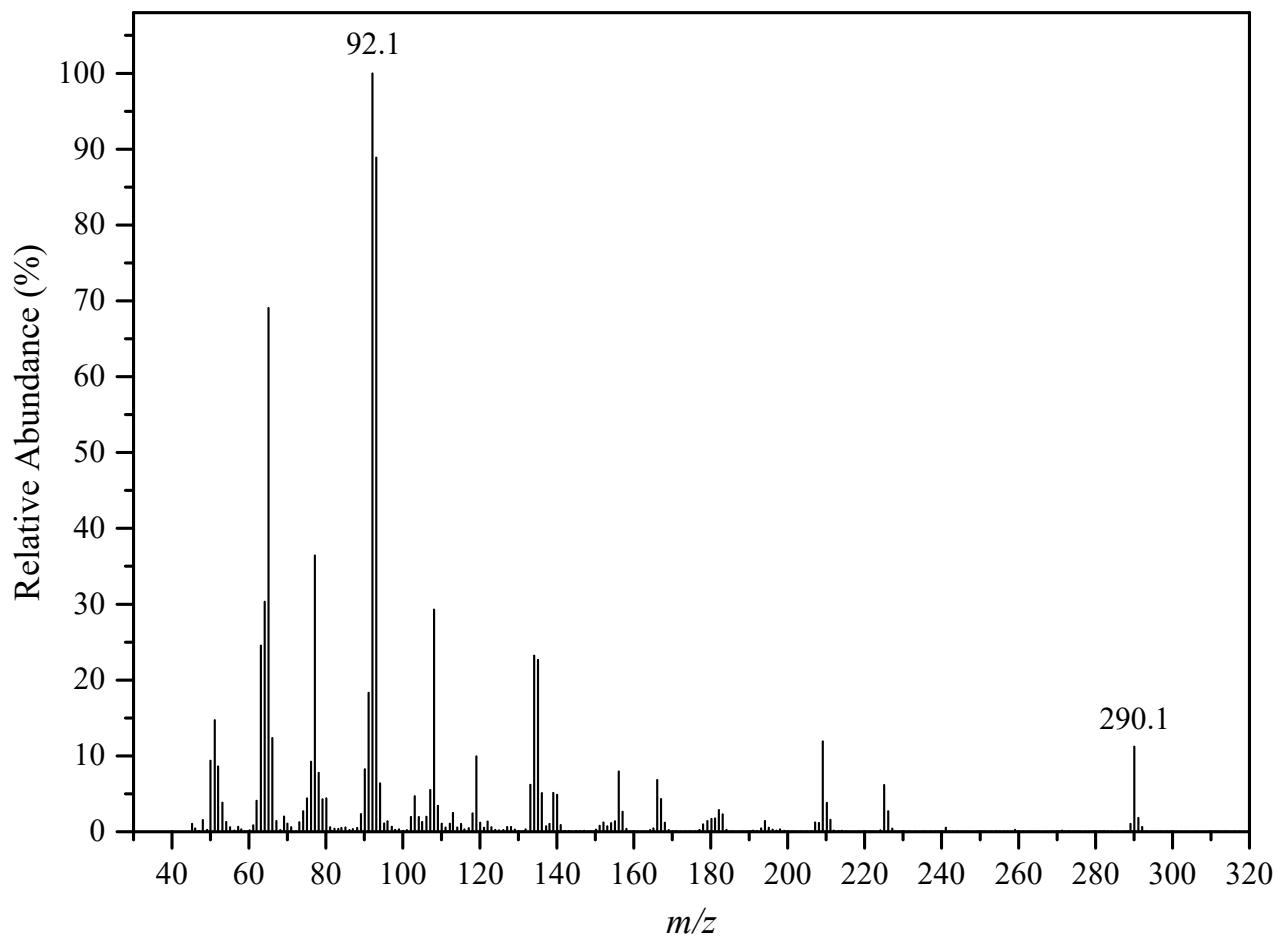

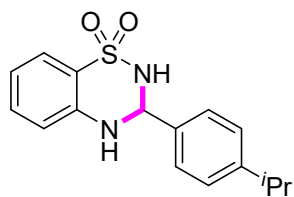

**3-(4-isopropylphenyl)-3,4-dihydro-2H-benzo[e][1,2,4]thiadiazine 1,1-dioxide (5d)**

**EI-MS:** C<sub>16</sub>H<sub>18</sub>N<sub>2</sub>O<sub>2</sub>S, m/z (%) = 302.1 (10%) [M<sup>+</sup>].

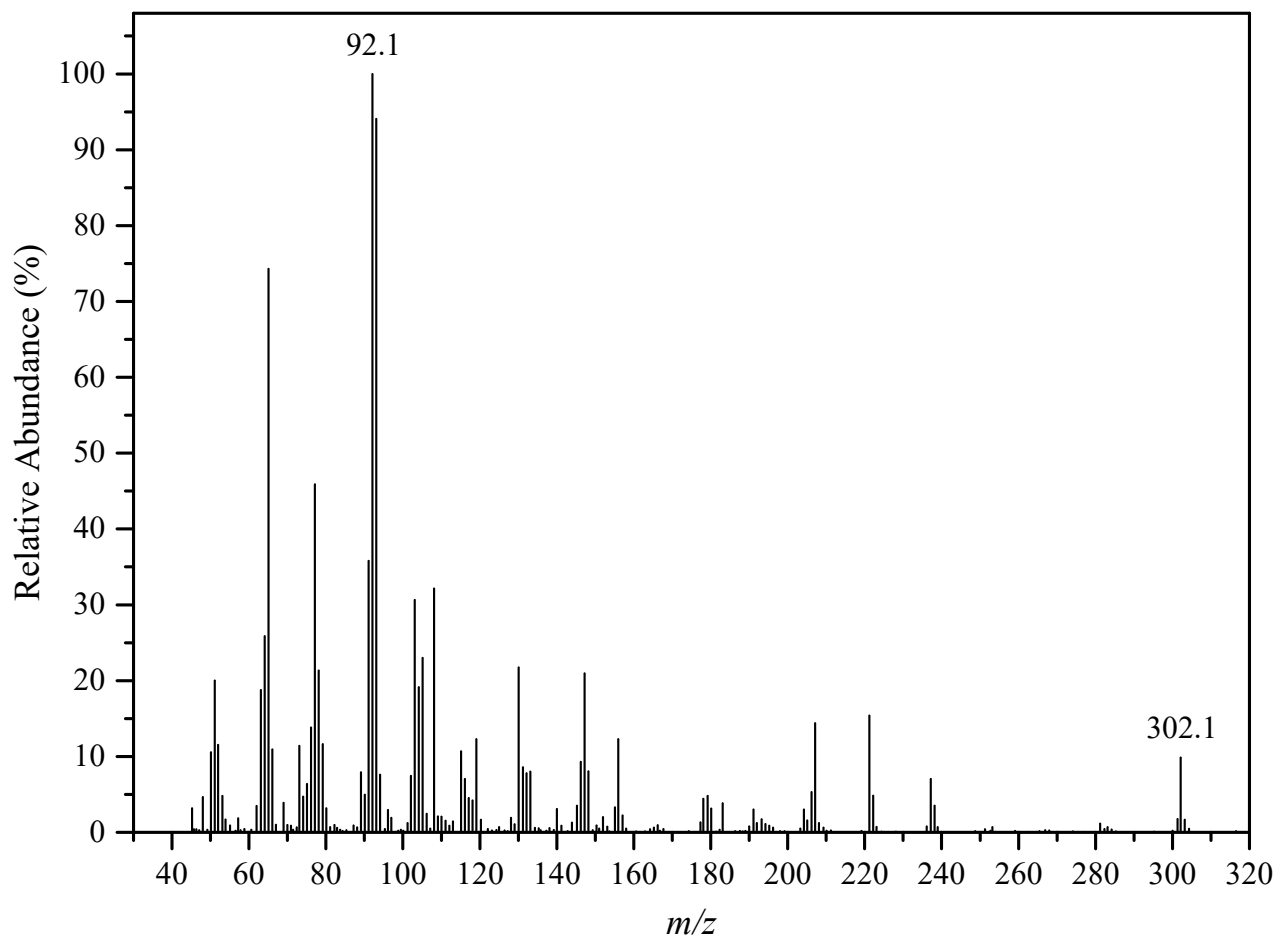

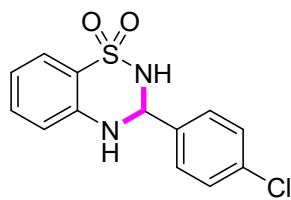

**3-(4-chlorophenyl)-3,4-dihydro-2H-benzo[e][1,2,4]thiadiazine 1,1-dioxide (5e)**

**EI-MS:** C<sub>13</sub>H<sub>11</sub>ClN<sub>2</sub>O<sub>2</sub>S, m/z (%) = 294.1 (6%) [M<sup>+</sup>].

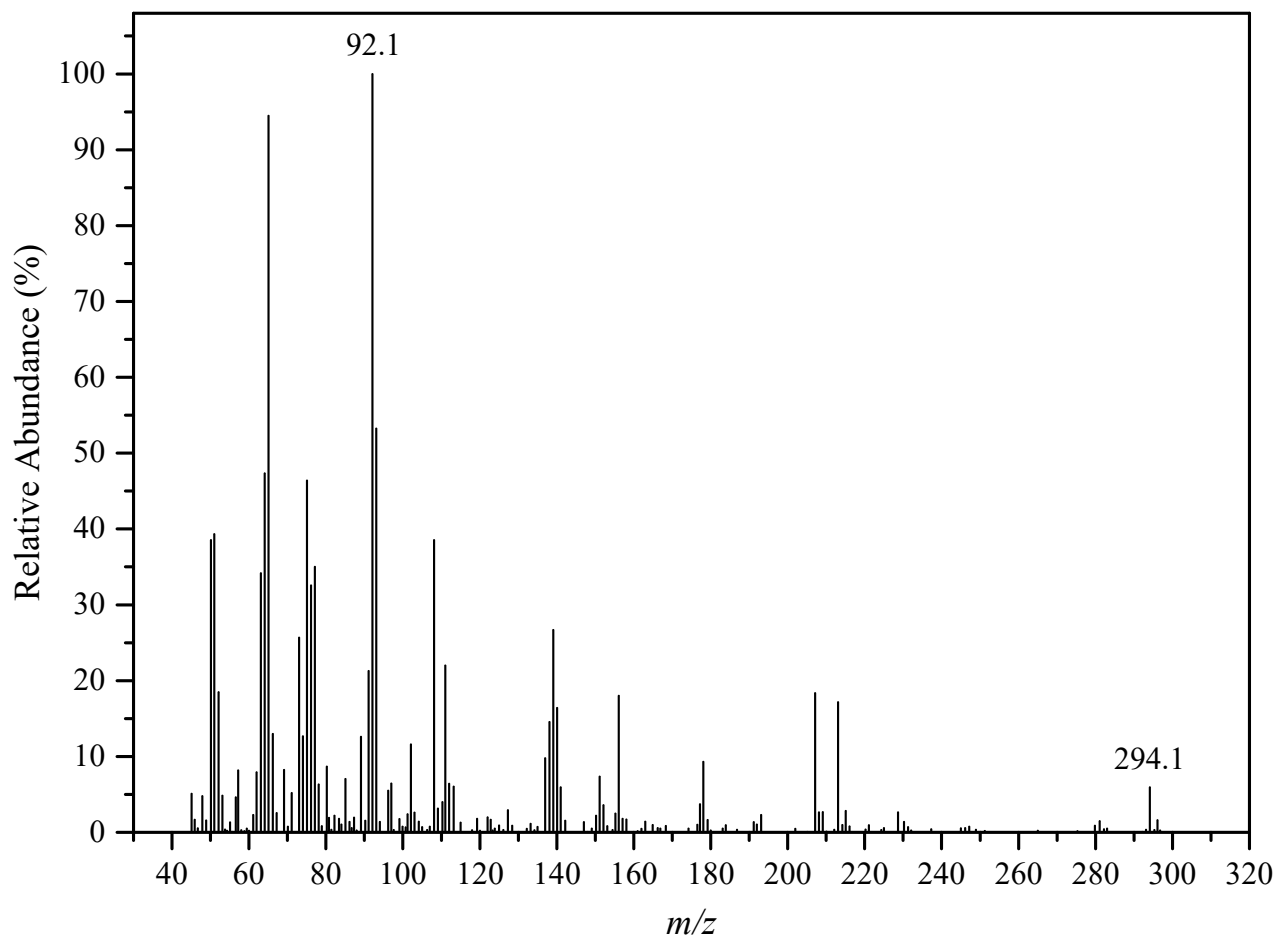

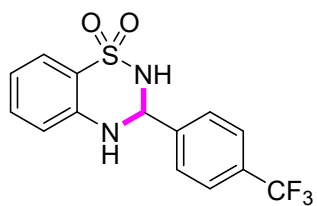

**3-(4-(trifluoromethyl)phenyl)-3,4-dihydro-2H-benzo[e][1,2,4]thiadiazine 1,1-dioxide (5f)**

**EI-MS:** C<sub>14</sub>H<sub>11</sub>F<sub>3</sub>N<sub>2</sub>O<sub>2</sub>S, m/z (%) = 328.0 (12%) [M<sup>+</sup>].

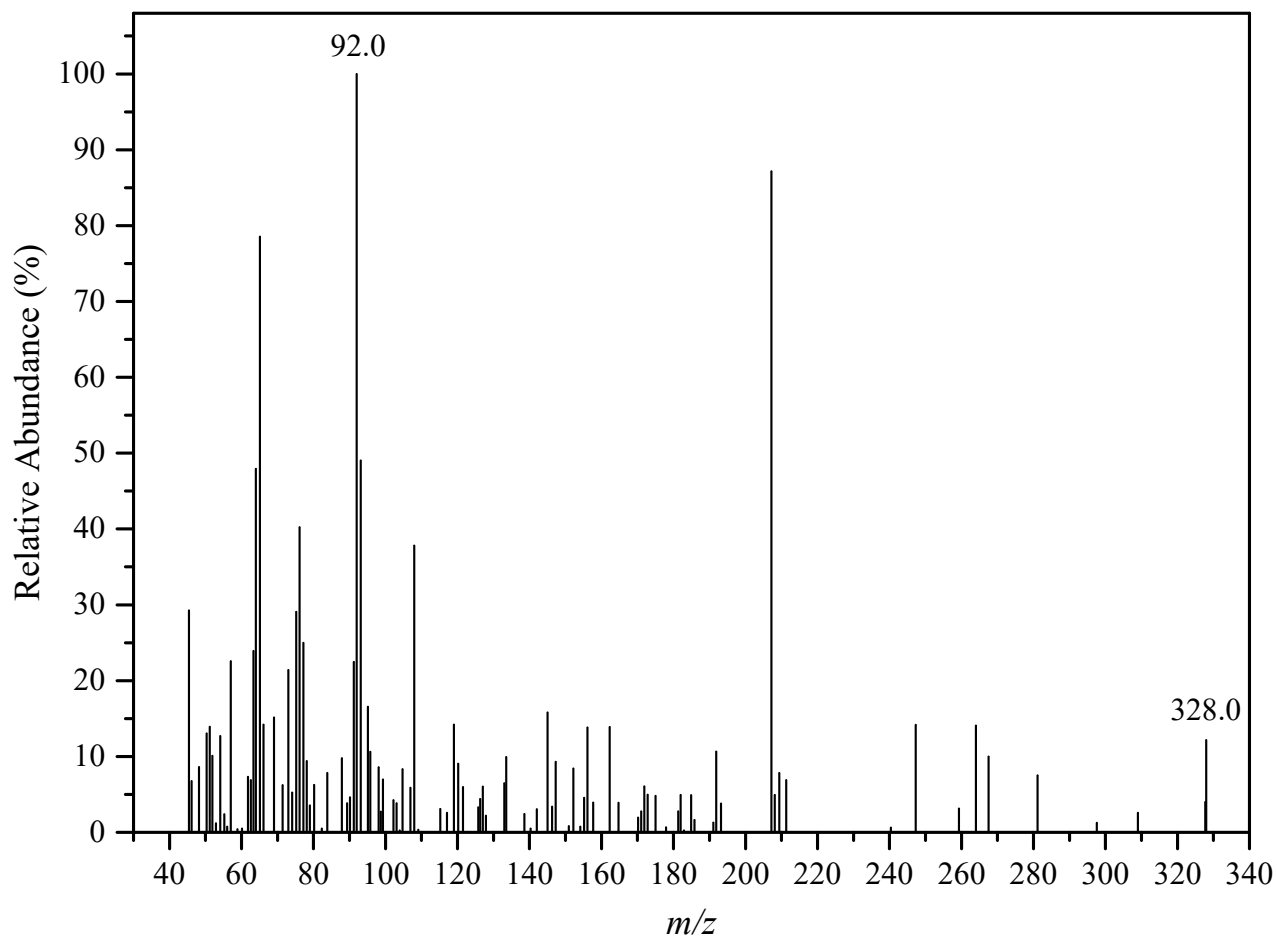

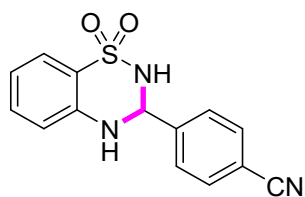

**4-(1,1-dioxido-3,4-dihydro-2*H*-benzo[e][1,2,4]thiadiazin-3-yl)benzonitrile (5g)**

**EI-MS:** C<sub>14</sub>H<sub>11</sub>CIN<sub>3</sub>O<sub>2</sub>S, *m/z* (%) = 285.1 (10%) [M<sup>+</sup>].

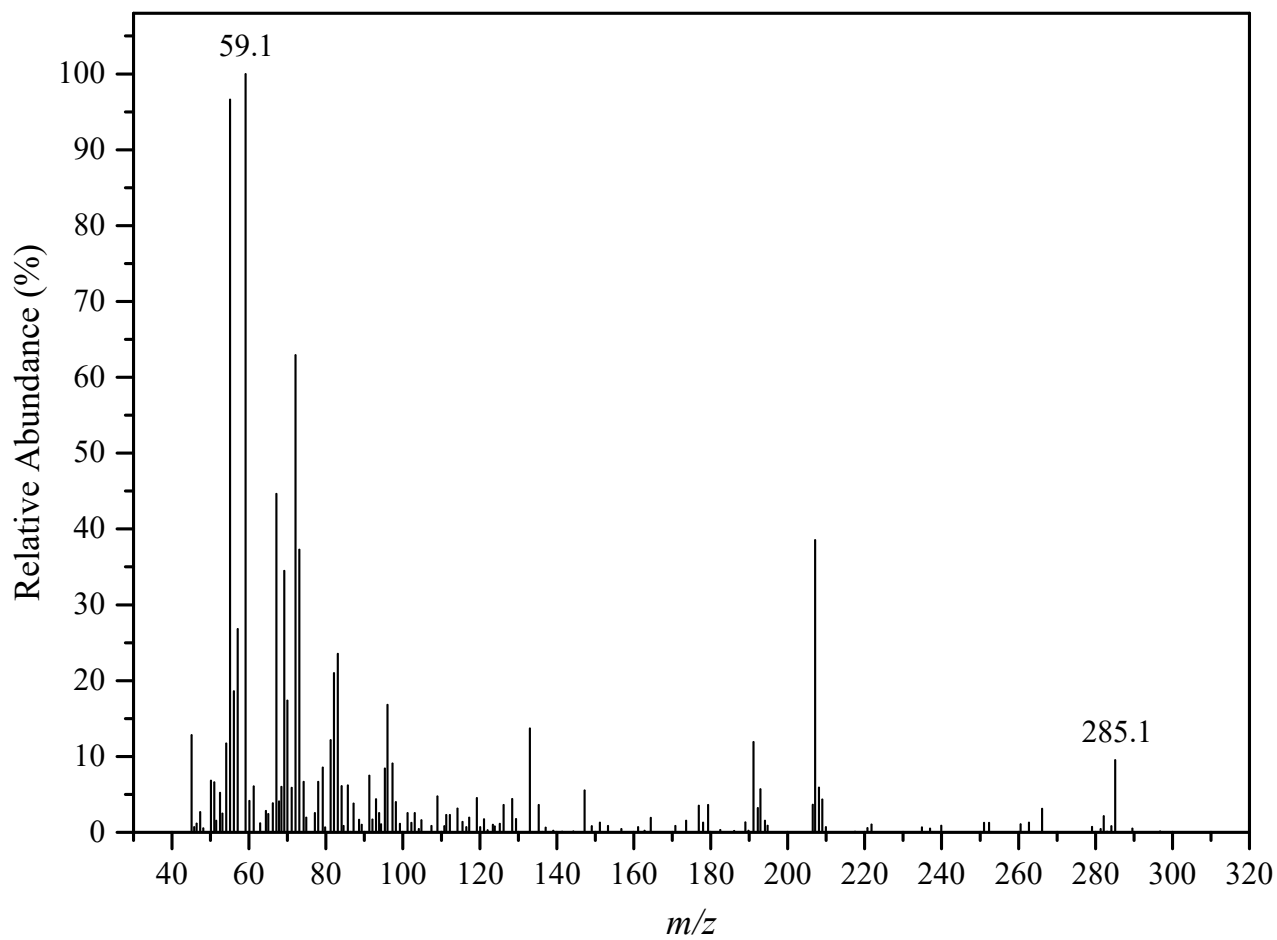



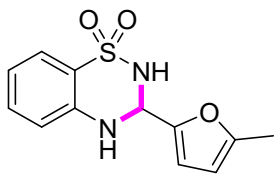

**3-(5-methylfuran-2-yl)-3,4-dihydro-2H-benzo[e][1,2,4]thiadiazine 1,1-dioxide (5h)**

**EI-MS:** C<sub>12</sub>H<sub>12</sub>N<sub>2</sub>O<sub>3</sub>S, m/z (%) =264.1 (18%) [M<sup>+</sup>].

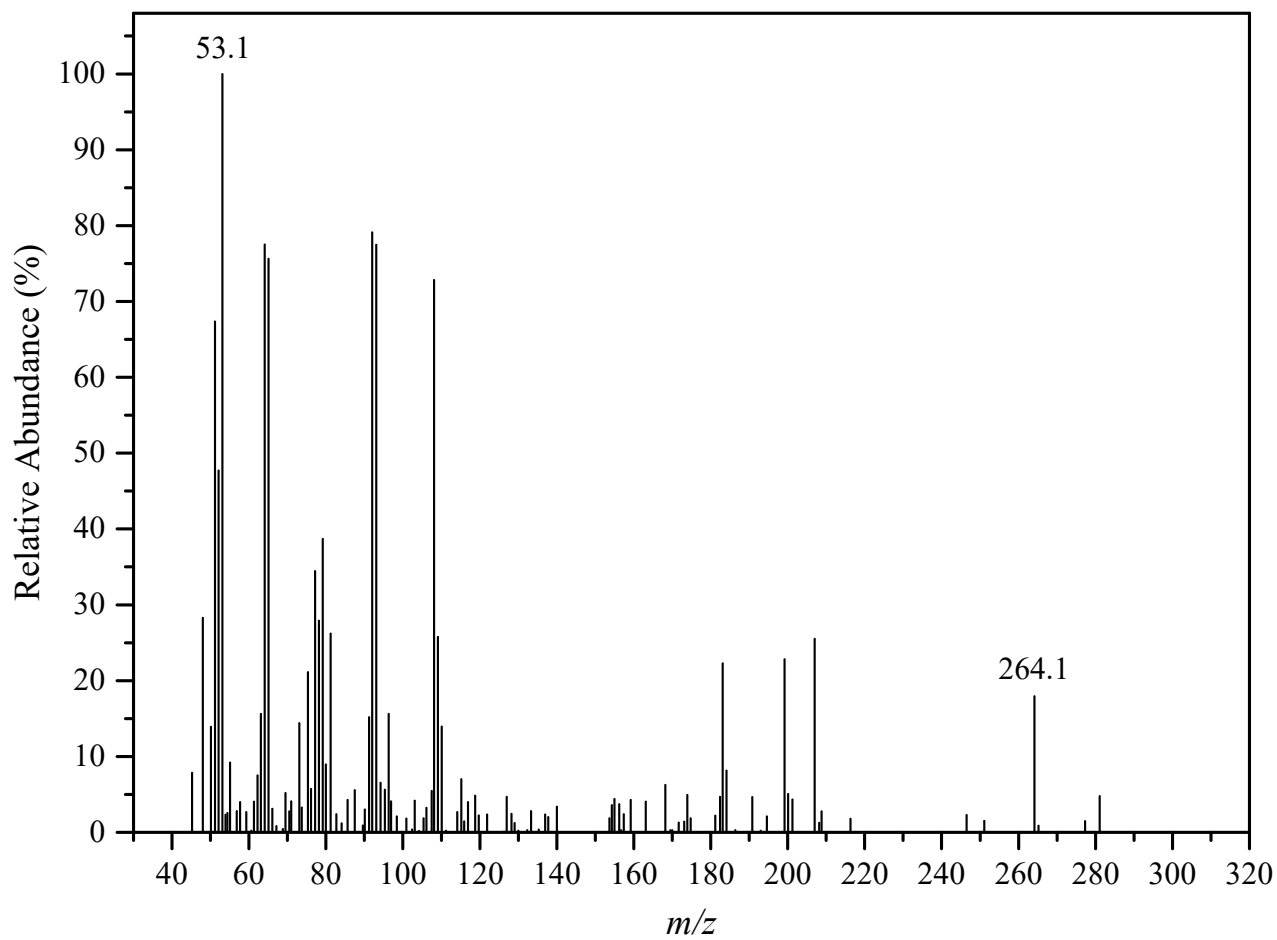

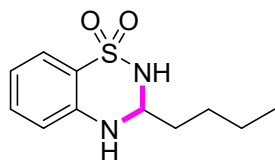

**3-butyl-3,4-dihydro-2H-benzo[e][1,2,4]thiadiazine 1,1-dioxide (5i)**

**EI-MS:** C<sub>11</sub>H<sub>16</sub>N<sub>2</sub>O<sub>2</sub>S, m/z (%) =240.1 (6%) [M<sup>+</sup>].

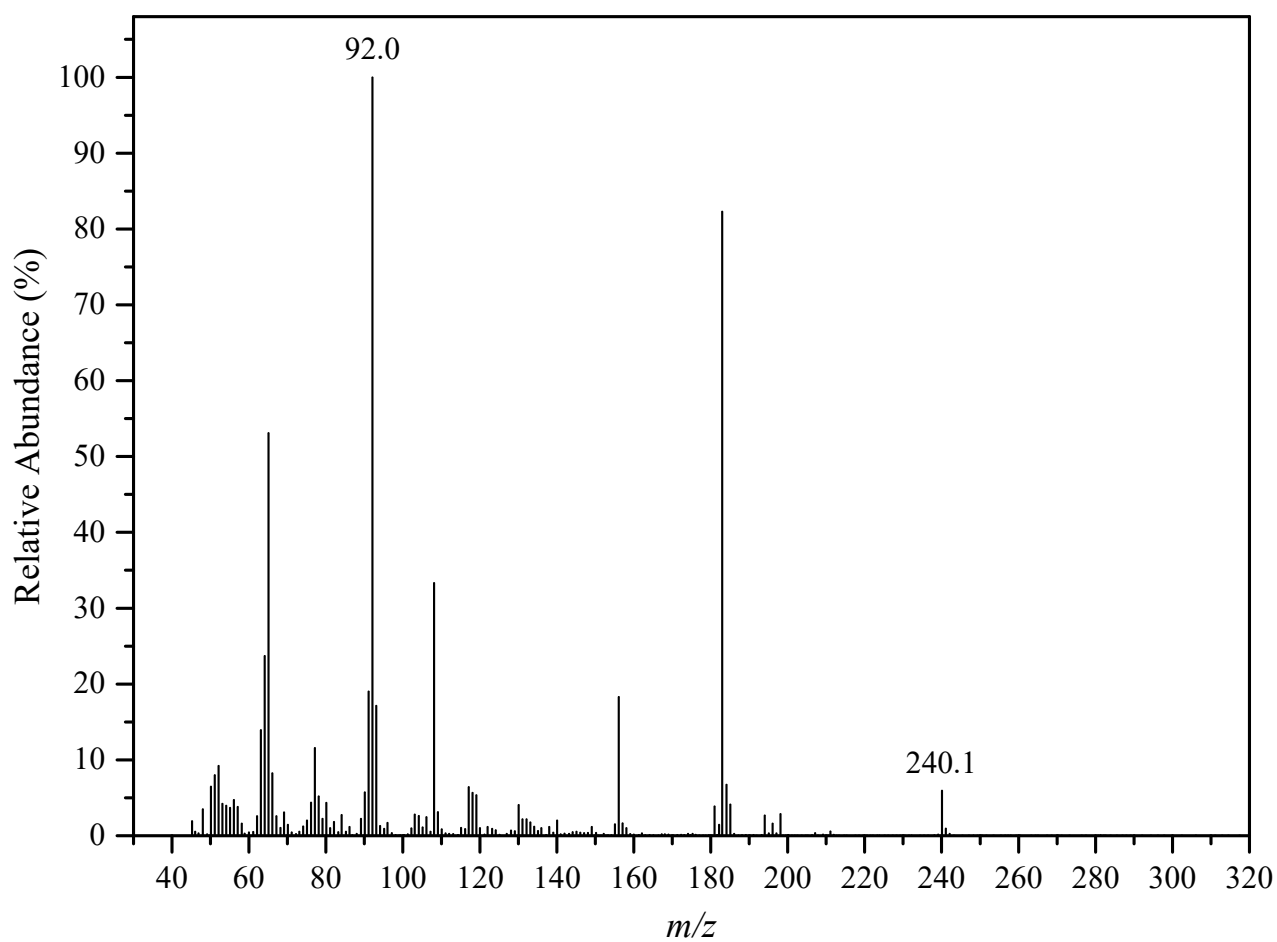

## 5. Notes and References

- (1) Bruker, A. *APEX3* Package, *APEX3*, *SAINTE* and *SADABS*. **2016**.
- (2) (a) Spek, A. L. Single-Crystal Structure Validation with the Program *PLATON*. *J. Appl. Crystal.* **2003**, *36*, 7-13; (b) Spek, A. L. Structure Validation in Chemical Crystallography. *Acta Crystal.* **2009**, *D65*, 148-155; (c) Spek, A. L. What Makes a Crystal Structure Report Valid? *Inorg. Chim. Acta* **2018**, *470*, 232-237; (d) Dolomanov, O. V.; Bourhis, L. J.; Gildea, R. J.; Howard, J. A.; Puschmann, H. *OLEX2*: A Complete Structure Solution, Refinement and Analysis Program. *J. Appl. Crystal.* **2009**, *42*, 339-341; (e) Sheldrick, G. M. SHELXT—Integrated Space-Group and Crystal-Structure Determination. *Acta Crystal.* **2015**, *A71*, 3-8; (f) Sheldrick, G. M. Crystal Structure Refinement with *SHELXL*. *Acta Crystal.* **2015**, *C71*, 3-8.
- (3) (a) Brese, N.; O'keeffe, M. Bond-Valence Parameters for Solids. *Acta Crystal.* **1991**, *B47*, 192-197; (b) Brown, I.; Altermatt, D. Bond-Valence Parameters Obtained from a Systematic Analysis of the Inorganic Crystal Structure Database. *Acta Crystal.* **1985**, *B41*, 244-247.
- (4) Velusamy, J.; Gopal, C. S.; Kesavan, M.; Ajithkumar, A.; Swaminathan S. Construction of Indium(III)-Organic Framework Based on a Flexible Cyclotriphosphazene-Derived Hexacarboxylate as a Reusable Green Catalyst for the Synthesis of Bioactive Aza-Heterocycles. *Inorg. Chem.* **2024**, *63*, 5446-5463.
- (5) Liu, Y.; Zhao, P.; Duan, C.; He, C. Three-Dimensional Neodymium Metal-Organic Framework for Catalyzing the Cyanosilylation of Aldehyde and the Synthesis of 2,3-Dihydroquinazolin-4(1*H*)-one Derivatives. *Inorg. Chem.* **2023**, *62*, 10359-10368.
- (6) Tamoradi, T.; Mousavi, S. M.; Mohammadi, M. Praseodymium(III) Anchored on CoFe<sub>2</sub>O<sub>4</sub> MNPs: An Efficient Heterogeneous Magnetic Nanocatalyst for One-Pot, Multi-Component Domino Synthesis of Polyhydroquinoline and 2,3-Dihydroquinazolin-4(1*H*)-one Derivatives. *New J. Chem.* **2020**, *44*, 3012-3020.
- (7) Xia, Q. C.; Zhang, S. Z.; Zhang, Y. X.; Bai, R. X.; Li, S. J.; Zhang, J.; Chen X. N. Few-Layered Metal-Organic Framework Nanosheets as Catalysts for the Synthesis of 2,3-Dihydroquinazolinone and Propargylamines. *ACS Appl. Nano Mater.* **2021**, *4*, 12108-12118.
- (8) Li, K.; Liu, Y. F.; Yang, G. P.; Zheng, Z. J.; Lin, X. L.; Zhang, Z. B.; Li, S. J.; Liu, Y. H.; Wei Y. G. Highly-stable Silver-ton-type U<sup>IV</sup>-containing Polyoxomolybdate Frameworks for the Heterogeneous Catalytic Synthesis of Quinazolinones. *Green Chem.* **2024**, *26*, 6454-6460.
- (9) Someshwar, D. D.; Kwon, T. L.; Byung, K. C.; Yeon, T. J. Green Approach toward One Pot Cascade Synthesis of 3-Aryl-3,4-Dihydro-1,2,4-Benzothiadiazine-1,1-Dioxides. *Phosphorus, Sulfur Silicon Relat. Elem.* **2014**, *189*, 40-51.
- (10) Kumar, S. K.; Rambabu, D.; Kumar, C. H. V.; Sreenivas, B. Y.; Prasad, K. R. S.; Rao, M. V. B.; Pal, M. Catalysis by Amberlyst-15 under Ultrasound in Water: A Green Synthesis of 1,2,4-Benzothiadiazine-1,1-Dioxides and Their Spiro Derivatives. *RSC Adv.* **2013**, *3*, 24863-24867.
- (11) Du, P.; Zhou, H.; Sui, Y.; Liu, Q.; Zou, K. Asymmetric Synthesis of 3,4-Dihydro-2*H*-1,2,4-Benzothiadiazine-1,1-Dioxides Catalyzed by Scandium(III)-Inda-Pybox. *Tetrahedron.* **2016**, *72*, 1573-1578.
